# Supplementary material
Source: PubMed Central journal article supplement (PMC8702434)
Supplement: mmc4.pdf [file mmc4.pdf]

We gratefully acknowledge the following Authors from the Originating laboratories responsible for obtaining the specimens, as well as the Submitting laboratories where the genome data were generated and shared via GISAID, on which this research is based.

All Submitters of data may be contacted directly via [www.gisaid.org](http://www.gisaid.org)

Authors are sorted alphabetically.

| <b>Accession ID</b> | <b>Originating Laboratory</b>                                                                              | <b>Submitting Laboratory</b> | <b>Authors</b>                                                                                                                                                                                                                                                                                                                                                                                                                                                     |
|---------------------|------------------------------------------------------------------------------------------------------------|------------------------------|--------------------------------------------------------------------------------------------------------------------------------------------------------------------------------------------------------------------------------------------------------------------------------------------------------------------------------------------------------------------------------------------------------------------------------------------------------------------|
| EPI_ISL_698296      | Group 42 (G42) Healthcare, Abu Dhabi, United Arab Emirates; Department of Health, The United Arab Emirates | G42 Healthcare               | Ashish Koshy; Budoor Alqarni; Denghui Liu; Fang Chen; Hanif Khalak; Huanming Yang; Javier Quilez; Jian Wang; Junhua Li; Ke Liang; Long Lin; Mohammed Saifuddin Fasihuddin; Nan Qiao; Nawal Ahmed Mohamed Al Kaabi; Pauline Ogrodzki; Pei Wu; Peng Xiao; Pengjuan Liu; Rong Liu; Sally Mahmoud; Siyang Liu; Stephen S. Francis; Tao Ma; Vinay Kusuma; Walid Abbas Zaher; Weibin Liu; Wenjun He; Xavier Anton; Xin Jin; Xin Meng; Xinyu Huang; Xun Xu; Zhaorong Yuan |

We gratefully acknowledge the following Authors from the Originating laboratories responsible for obtaining the specimens, as well as the Submitting laboratories where the genome data were generated and shared via GISAID, on which this research is based.

All Submitters of data may be contacted directly via [www.gisaid.org](http://www.gisaid.org)

Authors are sorted alphabetically.

| Accession ID                                                                                                                                                                   | Originating Laboratory                                                                                                                                                                                                                                                                         | Submitting Laboratory                                                                                                                                                                                                                                                                          | Authors                                                                                                                                                                                                                                                                                                                                                                                                                                                                                                                                                                                                           |
|--------------------------------------------------------------------------------------------------------------------------------------------------------------------------------|------------------------------------------------------------------------------------------------------------------------------------------------------------------------------------------------------------------------------------------------------------------------------------------------|------------------------------------------------------------------------------------------------------------------------------------------------------------------------------------------------------------------------------------------------------------------------------------------------|-------------------------------------------------------------------------------------------------------------------------------------------------------------------------------------------------------------------------------------------------------------------------------------------------------------------------------------------------------------------------------------------------------------------------------------------------------------------------------------------------------------------------------------------------------------------------------------------------------------------|
| EPI_ISL_2348742                                                                                                                                                                | Animal Health, Complutense University of Madrid                                                                                                                                                                                                                                                | Animal Health, Complutense University of Madrid                                                                                                                                                                                                                                                | Barroso-Arevalo, S.; J.M.; R. and Sanchez-Vizcaino; Rivera, B.; Sanchez                                                                                                                                                                                                                                                                                                                                                                                                                                                                                                                                           |
| EPI_ISL_3152898,<br>EPI_ISL_5761515,<br>EPI_ISL_5781752                                                                                                                        | Antech Diagnostics                                                                                                                                                                                                                                                                             | Diagnostic Virology Laboratory, National Veterinary Services Laboratories, USDA1920<br>Dayton Avenue, Ames, IA 50010, USA                                                                                                                                                                      | Emily R. Love; Kerrie M. Franzen; Mary L. Killian; Mia Torchetti; Suelee Robbe-Austerman; Tod P. Stuber                                                                                                                                                                                                                                                                                                                                                                                                                                                                                                           |
| EPI_ISL_5761526                                                                                                                                                                | Bronson Animal Disease Diagnostic Laboratory                                                                                                                                                                                                                                                   | Diagnostic Virology Laboratory, National Veterinary Services Laboratories, USDA1920<br>Dayton Avenue, Ames, IA 50010, USA                                                                                                                                                                      | Emily R. Love; Kerrie M. Franzen; Mary L. Killian; Mia Torchetti; Suelee Robbe-Austerman; Tod P. Stuber                                                                                                                                                                                                                                                                                                                                                                                                                                                                                                           |
| EPI_ISL_5315539                                                                                                                                                                | Center of excellence for emerging and re-emerging diseases in animals. Faculty of Veterinary Science, Chulalongkorn University                                                                                                                                                                 | Center of excellence for emerging and re-emerging diseases in animals. Faculty of Veterinary Science, Chulalongkorn University                                                                                                                                                                 | Alongkorn Amonsin; Ekkaapat Chamsai; Kamol Suwannakarn; Kamonpan Charoenkul; Kitikhun Udom; Navapon Techakriengkrai; Ratanaporn Tangwangvivat; Supassama Chaiyawong; Waleemas Jairak                                                                                                                                                                                                                                                                                                                                                                                                                              |
| EPI_ISL_4296308,<br>EPI_ISL_4296309                                                                                                                                            | Centers for Disease Control & Prevention                                                                                                                                                                                                                                                       | Genomics and Discovery, Respiratory Viruses Branch, Division of Viral Diseases, Centers for Disease Control and Prevention                                                                                                                                                                     | Adam Retchless; Anna Kelleher; Anna Uehara; Ausaf Ahmad; Brian Lynch; Claire Godino; Clinton R. Paden; Dhvani Batra; Haibin Wang; Han Jia Justin Ng; Jasmine Padilla; Jing Zhang; Justin Lee; Mark Burroughs; Mill Sheth; Morgan Davis; Owen Herzegh; Paige Bunkley; Peter Cook; Rachel Marine; Sarah Nobles; Suxiang Tong; Tara Coalter; Yan Li; Ying Tao                                                                                                                                                                                                                                                        |
| EPI_ISL_4549293                                                                                                                                                                | Clinical Laboratory, Vetsuisse Faculty, University of Zurich                                                                                                                                                                                                                                   | Department of Biosystems Science and Engineering, ETH Zürich                                                                                                                                                                                                                                   | Chaoran Chen; Christian Beisel; David Dreifuss; Elodie Burcklen; Ina Nissen; Ivan Topolsky; Julia Klaus; Katharina Jahn; Lara Fuhrmann; Marina Luisa Meli; Natascha Santacrose; Niko Beerenwinkel; Philipp Jablonski; Rebecca Denes; Regina Hofmann-Lehmann; Sarah Nadeau; Tanja Stadler                                                                                                                                                                                                                                                                                                                          |
| EPI_ISL_1241386                                                                                                                                                                | Connecticut Veterinary Medical Diagnostic Laboratory                                                                                                                                                                                                                                           | Department of Pathobiology, University of Connecticut                                                                                                                                                                                                                                          | Alyza Barbieri; Amelia Hunt; David H. Chung; Dong-Hun Lee; Guillermo Risatti; Ji-yeon Hyeon; Junwon Kim; Zeinab H. Helal                                                                                                                                                                                                                                                                                                                                                                                                                                                                                          |
| EPI_ISL_2663240                                                                                                                                                                | Department of Veterinary Public Health, Faculty of Veterinary Science, Chulalongkorn University                                                                                                                                                                                                | Department of Veterinary Public Health, Faculty of Veterinary Science, Chulalongkorn University                                                                                                                                                                                                | Boonyapisitsopa, S.; Bunpapong, N.; Chaiyawong, S.; Chamsai, E.; Charoenkul, K.; Jairak, W.; Poovorawan; Surachetpong, S.; Suwannakarn, K.; Tangwangvivat, R.; Tantilertcharoen, R.; Techakriengkrai, N.; Udom, K.; Y. and Amonsin, A.                                                                                                                                                                                                                                                                                                                                                                            |
| EPI_ISL_2628963                                                                                                                                                                | Department of Veterinary Public Health, Faculty of Veterinary Science, Chulalongkorn University, Bangkok, Thailand, Center of Excellence for Emerging and Re-emerging Infectious Diseases in Animals, and One Health Research Cluster, Faculty of Veterinary Science, Chulalongkorn University | Department of Veterinary Public Health, Faculty of Veterinary Science, Chulalongkorn University, Bangkok, Thailand, Center of Excellence for Emerging and Re-emerging Infectious Diseases in Animals, and One Health Research Cluster, Faculty of Veterinary Science, Chulalongkorn University | Boonyapisitsopa, S.; Bunpapong, N.; Chaiyawong, S.; Chamsai, E.; Charoenkul, K.; Jairak, W.; Poovorawan; Surachetpong, S.; Suwannakarn, K.; Tangwangvivat, R.; Tantilertcharoen, R.; Techakriengkrai, N.; Udom, K.; Y. and Amonsin, A.                                                                                                                                                                                                                                                                                                                                                                            |
| EPI_ISL_699508                                                                                                                                                                 | Diagnostic Virology Laboratory, USDA National Veterinary Services Laboratories                                                                                                                                                                                                                 | Diagnostic Virology Laboratory, USDA National Veterinary Services Laboratories                                                                                                                                                                                                                 | Akpalu, Y.; Auckland; Barton Behravesh, C.; C.M.; Davila, E.; E.R.; Fischer; Franzen; G.L.; Ghai; Hamer; I.B.; Jenkins-Moore, M.; K.M.; Killian; L.D.; Love; M.L.; Pauvolid-Correa, A.; R.R.; R.S.; Roundy; S.A.; Spengler, J.; Tang, W.; Torchetti, M.; Zecca                                                                                                                                                                                                                                                                                                                                                    |
| EPI_ISL_6088079                                                                                                                                                                | Diagnostic Virology Laboratory, National Veterinary Services Laboratories, USDA1920<br>Dayton Avenue, Ames, IA 50010, USA                                                                                                                                                                      | Diagnostic Virology Laboratory, National Veterinary Services Laboratories, USDA1920<br>Dayton Avenue, Ames, IA 50010, USA                                                                                                                                                                      | Emily R. Love; Kerrie M. Franzen; Mary L. Killian; Mia Torchetti; Suelee Robbe-Austerman; Tod P. Stuber                                                                                                                                                                                                                                                                                                                                                                                                                                                                                                           |
| EPI_ISL_722380                                                                                                                                                                 | Dutch COVID-19 response team                                                                                                                                                                                                                                                                   | Erasmus Medical Center                                                                                                                                                                                                                                                                         | Anne van der Linden; Annemiek van der Eijk; Bas Oude Munnink; Corine GeurtsvanKessel; David Nieuwenhuijsen; Emmanuelle Mungeer; Irina Chestakova; Marion Koopmans; Marjan Boter; Reina Sikkema; Richard Molenkamp; on behalf of the Dutch national COVID-19 response team.                                                                                                                                                                                                                                                                                                                                        |
| EPI_ISL_1220542                                                                                                                                                                | Equigerminal                                                                                                                                                                                                                                                                                   | Equigerminal                                                                                                                                                                                                                                                                                   | Isabel Fidalgo Carvalho                                                                                                                                                                                                                                                                                                                                                                                                                                                                                                                                                                                           |
| EPI_ISL_2932464,<br>EPI_ISL_2932465                                                                                                                                            | Genome Research Unit, Animal Health Research Institute                                                                                                                                                                                                                                         | Genome Research Unit, Animal Health Research Institute                                                                                                                                                                                                                                         | Ahmed, H.; El-Deeb, A.; Hagag, N.; Hamdy, M.; Shaheen, M.                                                                                                                                                                                                                                                                                                                                                                                                                                                                                                                                                         |
| EPI_ISL_2930558, EPI_ISL_2930560, EPI_ISL_2958983, EPI_ISL_3148884, EPI_ISL_3152899, EPI_ISL_5761517, EPI_ISL_5781753                                                          | see above                                                                                                                                                                                                                                                                                      | see above                                                                                                                                                                                                                                                                                      | see above                                                                                                                                                                                                                                                                                                                                                                                                                                                                                                                                                                                                         |
| EPI_ISL_6344510                                                                                                                                                                | IRTA-CReSA                                                                                                                                                                                                                                                                                     | Diagnostic Virology Laboratory, National Veterinary Services Laboratories, USDA1920<br>Dayton Avenue, Ames, IA 50010, USA                                                                                                                                                                      | Emily R. Love; Kerrie M. Franzen; Mary L. Killian; Mia Torchetti; Suelee Robbe-Austerman; Tod P. Stuber                                                                                                                                                                                                                                                                                                                                                                                                                                                                                                           |
| EPI_ISL_4253995                                                                                                                                                                | Kansas State University Veterinary Health Center                                                                                                                                                                                                                                               | IrsiCaixa                                                                                                                                                                                                                                                                                      | Bonaventura Clotet; Francesc Catala-Moll; J. Segalés; J. Vergara-Alert; J.Rodon; L.Fernandez; Marc Noguera-Julian; Maria Casadellà; Mariona Parera; Roger Paredes                                                                                                                                                                                                                                                                                                                                                                                                                                                 |
| EPI_ISL_3010052,<br>EPI_ISL_5781751                                                                                                                                            | Kansas State Veterinary Diagnostic Laboratory                                                                                                                                                                                                                                                  | Kansas State University Veterinary Diagnostic Laboratory                                                                                                                                                                                                                                       | Andrea Lu; David Upchurch; Don Harbidge; Emily Cox; Jamie Henningson; Jianfa Bai; Kelli Almes; Lance Noll; Rachel Palinski; Tyler Doerksen                                                                                                                                                                                                                                                                                                                                                                                                                                                                        |
| EPI_ISL_4344704                                                                                                                                                                | Laboratorio Biología Molecular, Inmunología y Microbiología (LaBIM), Instituto Multidisciplinario de Salud, Tecnología y Desarrollo (IMSAyD) UNSE-CONICET                                                                                                                                      | Diagnostic Virology Laboratory, National Veterinary Services Laboratories, USDA1920<br>Dayton Avenue, Ames, IA 50010, USA                                                                                                                                                                      | Emily R. Love; Kerrie M. Franzen; Mary L. Killian; Mia Torchetti; Suelee Robbe-Austerman; Tod P. Stuber                                                                                                                                                                                                                                                                                                                                                                                                                                                                                                           |
| EPI_ISL_848072, EPI_ISL_848073, EPI_ISL_848074, EPI_ISL_848075, EPI_ISL_848076, EPI_ISL_848077, EPI_ISL_848078, EPI_ISL_848079, EPI_ISL_848080, EPI_ISL_848081, EPI_ISL_848082 | Laboratorio Biología Molecular, Inmunología y Microbiología (LaBIM), Instituto Multidisciplinario de Salud, Tecnología y Desarrollo (IMSAyD) UNSE-CONICET                                                                                                                                      | Área de Secuenciación del Laboratorio de Virología del Hospital de Niños Dr. Ricardo Gutiérrez on behalf of 'Proyecto Argentino Interinstitucional de genómica de SARS-CoV-2' (PAIS Consortium)                                                                                                | Acuña; D; David Di Lullo; Fernando David Rivero; Francisco Lucatelli; Goya; LE; Lusso; MI; MS; Marcelo Ariel del Valle Ovejero; María Florencia Coronel; María Gracia Iovane; María Lorena Méndez; Nabaes Jodar; Natale; Pablo Santiago Yute; S; Valinotto; Viegas, M.                                                                                                                                                                                                                                                                                                                                            |
| EPI_ISL_848072, EPI_ISL_848073, EPI_ISL_848074, EPI_ISL_848075, EPI_ISL_848076, EPI_ISL_848077, EPI_ISL_848078, EPI_ISL_848079, EPI_ISL_848080, EPI_ISL_848081, EPI_ISL_848082 | Laboratory of Clinical Research on Dermatoozoonoses in Domestic Animals, Evandro Chagas National Institute of Infectious Diseases, Oswaldo Cruz Foundation (Fiocruz), Rio de Janeiro, RJ, Brazil.                                                                                              | Laboratory of Respiratory Viruses and Measles, Oswaldo Cruz Institute, FIOCRUZ                                                                                                                                                                                                                 | Alex Pauvolid-Corrêa; Alice Sampaio Barreto da Rocha; Anielle de Pina Costa; Artur Augusto Velho Mendes Junior; Ezequias Batista Martins; Fernando do Couto Motta; Guilherme Amaral Calveti; Isabella Campos Vargas de Moraes; Isabella Dilo Ferreira Gremião; Lucas Oliveira Keidel; Lusiele Guaraldo; Maria Ogrzewalska; Mariêda Mendonça Siqueira on behalf of the Fiocruz COVID-19 Genomic Surveillance Network; Michelle Fernanda Borges da Silva; Paola Cristina Resende; Patrícia Brasil; Renato Orsini Omellas; Rodrigo Caldas Menezes; Sandro Antônio Pereira; Shanna Araujo dos Santos; Thiago C. Souza |
| EPI_ISL_2566664                                                                                                                                                                | MEPHI, Aix Marseille University                                                                                                                                                                                                                                                                | MEPHI, Aix Marseille University                                                                                                                                                                                                                                                                | Anthony LEVASSEUR                                                                                                                                                                                                                                                                                                                                                                                                                                                                                                                                                                                                 |
| EPI_ISL_1750982,<br>EPI_ISL_1751194,<br>EPI_ISL_1751195,<br>EPI_ISL_1751196                                                                                                    | Max von Pettenkofer Institute, Virology, National Reference Center for Retroviruses, LMU Munich                                                                                                                                                                                                | Laboratory for Functional Genome Analysis; Dept. Genomics; Gene Center of the LMU Munich                                                                                                                                                                                                       | Alexander Graf; Helmut Blum; Max Muenchhoff; Oliver Keppler; Stefan Krebs                                                                                                                                                                                                                                                                                                                                                                                                                                                                                                                                         |
| EPI_ISL_3010051                                                                                                                                                                | Penn Vet University of Pennsylvania Ryan Veterinary Hospital                                                                                                                                                                                                                                   | Diagnostic Virology Laboratory, National Veterinary Services Laboratories, USDA1920<br>Dayton Avenue, Ames, IA 50010, USA                                                                                                                                                                      | Emily R. Love; Kerrie M. Franzen; Mary L. Killian; Mia Torchetti; Suelee Robbe-Austerman; Tod P. Stuber                                                                                                                                                                                                                                                                                                                                                                                                                                                                                                           |
| EPI_ISL_1490671                                                                                                                                                                | Pharmacy Department, Facultad de CC Salud, UCH-CEU University                                                                                                                                                                                                                                  | Pharmacy Department, Facultad de CC Salud, UCH-CEU University                                                                                                                                                                                                                                  | Miguel Padilla-Blanco                                                                                                                                                                                                                                                                                                                                                                                                                                                                                                                                                                                             |
| EPI_ISL_450403                                                                                                                                                                 | School of Public Health, The University of Hong Kong                                                                                                                                                                                                                                           | School of Public Health, The University of Hong Kong                                                                                                                                                                                                                                           | Brackman; C.J.; Chu; D.K.W.; D.N.C.; L.D.; L.L.M. and Peiris, M.; Perera; Poon; R.A.P.M.; Sims; Sit; T.H.S.; Tsang                                                                                                                                                                                                                                                                                                                                                                                                                                                                                                |
| EPI_ISL_414518                                                                                                                                                                 | Tai Lung Veterinary Laboratory, Agriculture, Fisheries and Conservation Department                                                                                                                                                                                                             | School of Public Health, The University of Hong Kong                                                                                                                                                                                                                                           | Christopher J Brackman; Daniel K.W. Chu; Leo L.M. Poon; Malik Peiris; Thomas S.H. Chung                                                                                                                                                                                                                                                                                                                                                                                                                                                                                                                           |
| EPI_ISL_1315074                                                                                                                                                                | Texas A&M College of Veterinary Medicine & Biomedical Sciences via Wisconsin Veterinary Diagnostic Laboratory, University of Wisconsin-Madison                                                                                                                                                 | Diagnostic Virology Laboratory, National Veterinary Services Laboratories, USDA1920<br>Dayton Avenue, Ames, IA 50010, USA                                                                                                                                                                      | Ailam Lim; Casey Barton Behravesh; Emily R. Love; Gabriel L. Hamer; Kerrie M. Franzen; Mary L. Killian; Ria R. Ghai; Sarah A. Hamer                                                                                                                                                                                                                                                                                                                                                                                                                                                                               |
| EPI_ISL_7373930                                                                                                                                                                | The Ohio State University Department of Veterinary Preventive Medicine                                                                                                                                                                                                                         | The Ohio State University Applied Microbiology Services Laboratory                                                                                                                                                                                                                             | Amanda Williams; Andrew Bowman; Dakota Sizemore; Devra Huey; Dillon S. McBride; Francesca Savona; Jacob Smith; Jaqueline M. Nolting; Seth Faith                                                                                                                                                                                                                                                                                                                                                                                                                                                                   |
| EPI_ISL_6088012                                                                                                                                                                | The Ohio State University Infectious Diseases Institute                                                                                                                                                                                                                                        | Diagnostic Virology Laboratory, National Veterinary Services Laboratories, USDA1920<br>Dayton Avenue, Ames, IA 50010, USA                                                                                                                                                                      | Emily R. Love; Kerrie M. Franzen; Mary L. Killian; Mia Torchetti; Suelee Robbe-Austerman; Tod P. Stuber                                                                                                                                                                                                                                                                                                                                                                                                                                                                                                           |
| EPI_ISL_730652                                                                                                                                                                 | University of Bari, Valenzano, Italy                                                                                                                                                                                                                                                           | Dept. Food safety, Nutrition and Veterinary Public Health, Istituto superiore di sanità                                                                                                                                                                                                        | C. Buonavoglia; C. Desario; D. Buonavoglia, V.; E. Lorusso; G. Elia; G. Vaccari; I. Di Bartolo; L. De Sabato; Martella; N. Decaro; U. Agrimi                                                                                                                                                                                                                                                                                                                                                                                                                                                                      |
| EPI_ISL_3152901                                                                                                                                                                | University of Georgia Veterinary Diagnostic Laboratory                                                                                                                                                                                                                                         | Diagnostic Virology Laboratory, National Veterinary Services Laboratories, USDA1920<br>Dayton Avenue, Ames, IA 50010, USA                                                                                                                                                                      | Emily R. Love; Kerrie M. Franzen; Mary L. Killian; Mia Torchetti; Suelee Robbe-Austerman; Tod P. Stuber                                                                                                                                                                                                                                                                                                                                                                                                                                                                                                           |
| EPI_ISL_6949571,<br>EPI_ISL_6949572                                                                                                                                            | University of Sarajevo, Veterinary Faculty, Laboratory for Molecular Diagnostic and Research                                                                                                                                                                                                   | University of Sarajevo, Veterinary Faculty, Laboratory for Molecular Diagnostic and Research                                                                                                                                                                                                   | Goletic S; Goletic T; Hodzic A; Jazic A; Nicevic M; Sabic E; Softic A; Terzic I                                                                                                                                                                                                                                                                                                                                                                                                                                                                                                                                   |
| EPI_ISL_5194358                                                                                                                                                                | University of Sarajevo, Veterinary Faculty, Laboratory for Molecular Diagnostic and Research Laboratory                                                                                                                                                                                        | University of Sarajevo, Veterinary Faculty, Laboratory for Molecular Diagnostic and Research Laboratory                                                                                                                                                                                        | Goletic S; Goletic T; Hodzic A.; Jazic A.; Nicevic M.; Sabic E.; Softic A; Terzic I.                                                                                                                                                                                                                                                                                                                                                                                                                                                                                                                              |
| EPI_ISL_2674897                                                                                                                                                                | Veterinarski Fakultet Sveučiliša u Zagrebu                                                                                                                                                                                                                                                     | Hrvatski zavod za javno zdravstvo                                                                                                                                                                                                                                                              | Irena Tabain; Ivana Ferenčak                                                                                                                                                                                                                                                                                                                                                                                                                                                                                                                                                                                      |
| EPI_ISL_3128553,<br>EPI_ISL_3128555,<br>EPI_ISL_3128557,<br>EPI_ISL_3148877,<br>EPI_ISL_3148880                                                                                | Wisconsin Veterinary Diagnostic Laboratory                                                                                                                                                                                                                                                     | Diagnostic Virology Laboratory, National Veterinary Services Laboratories, USDA1920<br>Dayton Avenue, Ames, IA 50010, USA                                                                                                                                                                      | Emily R. Love; Kerrie M. Franzen; Mary L. Killian; Mia Torchetti; Suelee Robbe-Austerman; Tod P. Stuber                                                                                                                                                                                                                                                                                                                                                                                                                                                                                                           |

We gratefully acknowledge the following Authors from the Originating laboratories responsible for obtaining the specimens, as well as the Submitting laboratories where the genome data were generated and shared via GISAID, on which this research is based.

All Submitters of data may be contacted directly via [www.gisaid.org](http://www.gisaid.org)

Authors are sorted alphabetically.

| <b>Accession ID</b> | <b>Originating Laboratory</b>                                               | <b>Submitting Laboratory</b>                                                                                           | <b>Authors</b>                                                                                          |
|---------------------|-----------------------------------------------------------------------------|------------------------------------------------------------------------------------------------------------------------|---------------------------------------------------------------------------------------------------------|
| EPI_ISL_5899831     | Veterinary Diagnostic Laboratory University of Illinois at Urbana-Champaign | Diagnostic Virology Laboratory, National Veterinary Services Laboratories, USDA1920 Dayton Avenue, Ames, IA 50010, USA | Emily R. Love; Kerrie M. Franzen; Mary L. Killian; Mia Torchetti; Suelee Robbe-Austerman; Tod P. Stuber |

We gratefully acknowledge the following Authors from the Originating laboratories responsible for obtaining the specimens, as well as the Submitting laboratories where the genome data were generated and shared via GISAID, on which this research is based.

All Submitters of data may be contacted directly via [www.gisaid.org](http://www.gisaid.org)

Authors are sorted alphabetically.

| <b>Accession ID</b> | <b>Originating Laboratory</b>                                               | <b>Submitting Laboratory</b>                                                                                           | <b>Authors</b>                                                                                          |
|---------------------|-----------------------------------------------------------------------------|------------------------------------------------------------------------------------------------------------------------|---------------------------------------------------------------------------------------------------------|
| EPI_ISL_5899831     | Veterinary Diagnostic Laboratory University of Illinois at Urbana-Champaign | Diagnostic Virology Laboratory, National Veterinary Services Laboratories, USDA1920 Dayton Avenue, Ames, IA 50010, USA | Emily R. Love; Kerrie M. Franzen; Mary L. Killian; Mia Torchetti; Suelee Robbe-Austerman; Tod P. Stuber |

We gratefully acknowledge the following Authors from the Originating laboratories responsible for obtaining the specimens, as well as the Submitting laboratories where the genome data were generated and shared via GISAID, on which this research is based.

All Submitters of data may be contacted directly via [www.gisaid.org](http://www.gisaid.org)

Authors are sorted alphabetically.

| <b>Accession ID</b> | <b>Originating Laboratory</b>                                                                                                    | <b>Submitting Laboratory</b>             | <b>Authors</b>                                                                                                                                                                                                                                                                                                              |
|---------------------|----------------------------------------------------------------------------------------------------------------------------------|------------------------------------------|-----------------------------------------------------------------------------------------------------------------------------------------------------------------------------------------------------------------------------------------------------------------------------------------------------------------------------|
| EPI_ISL_444108      | University College London, Great Ormond Street Hospital for Children NHS Foundation Trust, Imperial College Healthcare NHS Trust | COVID-19 Genomics UK (COG-UK) Consortium | Alison Holmes; Charlotte Williams; Helena Tutill; Jacqueline Findlay; James Price; Judith Breuer; Julianne Brown; Kathryn Harris; Leysa Forrest; Mark Kristiansen; Paola Niola; Paola Resende Silva; Patricia Dyal; Paul Randell; Rachel Williams; Sam Weeks; Sergi Castellano; Sunando Roy; Tony Brooks; Yasmin Panchbhaya |

We gratefully acknowledge the following Authors from the Originating laboratories responsible for obtaining the specimens, as well as the Submitting laboratories where the genome data were generated and shared via GISAID, on which this research is based.

All Submitters of data may be contacted directly via [www.gisaid.org](http://www.gisaid.org)

Authors are sorted alphabetically.

| <b>Accession ID</b> | <b>Originating Laboratory</b>                              | <b>Submitting Laboratory</b>                                                                                           | <b>Authors</b>                                                                                          |
|---------------------|------------------------------------------------------------|------------------------------------------------------------------------------------------------------------------------|---------------------------------------------------------------------------------------------------------|
| EPI_ISL_6810900     | Colorado State University Veterinary Diagnostic Laboratory | Diagnostic Virology Laboratory, National Veterinary Services Laboratories, USDA1920 Dayton Avenue, Ames, IA 50010, USA | Emily R. Love; Kerrie M. Franzen; Mary L. Killian; Mia Torchetti; Suelee Robbe-Austerman; Tod P. Stuber |

We gratefully acknowledge the following Authors from the Originating laboratories responsible for obtaining the specimens, as well as the Submitting laboratories where the genome data were generated and shared via GISAID, on which this research is based.

All Submitters of data may be contacted directly via [www.gisaid.org](http://www.gisaid.org)

Authors are sorted alphabetically.

| <b>Accession ID</b> | <b>Originating Laboratory</b>                                          | <b>Submitting Laboratory</b>                                                                                                    | <b>Authors</b>                                                                                                                                                                                                                  |
|---------------------|------------------------------------------------------------------------|---------------------------------------------------------------------------------------------------------------------------------|---------------------------------------------------------------------------------------------------------------------------------------------------------------------------------------------------------------------------------|
| EPI_ISL_420157      | Virology Department, Sheffield Teaching Hospitals NHS Foundation Trust | Department of Infection, Immunity and Cardiovascular Disease, The Florey Institute, The Medical School, University of Sheffield | Adri Angyal; Alex Keeley; Benjamin Lindsey; Cariad Evans; Danielle Groves; Dave Partridge; Luke Green; Matthew Parker; Matthew Wyles; Mehmet Yavuz; Mohammad Raza; Paul Parsons; Rachel Tucker; Rebecca Brown; Thushan de Silva |

We gratefully acknowledge the following Authors from the Originating laboratories responsible for obtaining the specimens, as well as the Submitting laboratories where the genome data were generated and shared via GISAID, on which this research is based.

All Submitters of data may be contacted directly via [www.gisaid.org](http://www.gisaid.org)

Authors are sorted alphabetically.

| Accession ID                                                                                         | Originating Laboratory                                                                                                                                                                                            | Submitting Laboratory                                                                                                                                                                                      | Authors                                                                                                                                                                                                                                                                                                                                                                                                                                                                                                                                                                                                           |
|------------------------------------------------------------------------------------------------------|-------------------------------------------------------------------------------------------------------------------------------------------------------------------------------------------------------------------|------------------------------------------------------------------------------------------------------------------------------------------------------------------------------------------------------------|-------------------------------------------------------------------------------------------------------------------------------------------------------------------------------------------------------------------------------------------------------------------------------------------------------------------------------------------------------------------------------------------------------------------------------------------------------------------------------------------------------------------------------------------------------------------------------------------------------------------|
| EPI_ISL_3857106                                                                                      | 1 - VetAgro Sup, Université de Lyon, 69280 Marcy-l'Étoile, France 2 - CIRI-Centre International de Recherche en Infectiologie, Team EVIR, Université Claude Bernard Lyon 1, Inserm, U111, CNRS, UMR5308, ENS Lyon | 1 - Université de Caen, Groupe de Recherche sur l'Adaptation Microbienne (GRAM 2.0), Normandie Université, UNICAEN, UNIROUEN, EA2656 2 - Laboratoire de Virologie, Centre Hospitalo-Universitaire de Caen. | *; 2; 4; 5; Angeli Kodjo 1; Bertrand Boson 2; Bryce Leterrier 3; Emilie Krafft 1; Eric M. Leroy 5; François-Loïc Cosset 2; Matthieu Fritz 5; Meriadeg Ar Goulh 3; Nicolas Nesi 3; Sandrine Corbet 4; Solène Denolly 2; Sophie Angeloz-Pessey 1; Sophie Levaltier 3; †; ‡; ¶ and Vincent Legros 1                                                                                                                                                                                                                                                                                                                  |
| EPI_ISL_3838696                                                                                      | 1 - VetAgro Sup, Université de Lyon, 69280 Marcy-l'Étoile, France 2 - CIRI-Centre International de Recherche en Infectiologie, Team EVIR, Université Claude Bernard Lyon 1, Inserm, U111, CNRS, UMR5308, ENS Lyon | 1 - Université de Caen, Groupe de Recherche sur l'Adaptation Microbienne (GRAM 2.0), Normandie Université, UNICAEN, UNIROUEN, EA2656 2 - Laboratoire de Virologie, Centre Hospitalo-Universitaire de Caen. | *; 2; 4; 5; Angeli Kodjo 1; Bertrand Boson 2; Bryce Leterrier 3; Emilie Krafft 1; Eric M. Leroy 5; François-Loïc Cosset 2; Matthieu Fritz 5; Meriadeg Ar Goulh 3; Nicolas Nesi 3; Sandrine Corbet 4; Solène Denolly 2; Sophie Angeloz-Pessey 1; Sophie Levaltier 3; †; ‡; ¶ and Vincent Legros 1                                                                                                                                                                                                                                                                                                                  |
| EPI_ISL_2958982, EPI_ISL_3128551, EPI_ISL_3152900                                                    | Antech Diagnostics                                                                                                                                                                                                | Diagnostic Virology Laboratory, National Veterinary Services Laboratories, USDA1920 Dayton Avenue, Ames, IA 50010, USA                                                                                     | Emily R. Love; Kerrie M. Franzen; Mary L. Killian; Mia Torchetti; Suelee Robbe-Austerman; Tod P. Stuber                                                                                                                                                                                                                                                                                                                                                                                                                                                                                                           |
| EPI_ISL_4955857                                                                                      | Antech Diagnostics                                                                                                                                                                                                | National Veterinary Services Laboratories - USDA Diagnostic Virology Laboratory                                                                                                                            | Emily R. Love; Kerrie M. Franzen; Mary L. Killian; Mia Torchetti; Suelee Robbe-Austerman; Tod P. Stuber                                                                                                                                                                                                                                                                                                                                                                                                                                                                                                           |
| EPI_ISL_1219234, EPI_ISL_6204713, EPI_ISL_6204714                                                    | BIOR                                                                                                                                                                                                              | Latvian Biomedical Research and Study Centre                                                                                                                                                               | Alise Jakovele; Daina Pule; Davids Fridmanis; Elina Dimina; Guntars Zarins; Irena Meistere; Ivars Silamikelis; Janis Klovinis; Janis Pjalkovskis; Jurjjs Perevoscikovs; Kaspars Megnis; Laila Silamikele; Lauma Freimane; Laura Ansons; Laura Krivko; Liga Birzniece; Monta Briviba; Monta Ustinova; Nikita Zrelavs; Uga Dumpis; Una Krumina; Vita Rovite                                                                                                                                                                                                                                                         |
| EPI_ISL_5761534                                                                                      | Bronson Animal Disease Diagnostic Laboratory                                                                                                                                                                      | Diagnostic Virology Laboratory, National Veterinary Services Laboratories, USDA1920 Dayton Avenue, Ames, IA 50010, USA                                                                                     | Emily R. Love; Kerrie M. Franzen; Mary L. Killian; Mia Torchetti; Suelee Robbe-Austerman; Tod P. Stuber                                                                                                                                                                                                                                                                                                                                                                                                                                                                                                           |
| EPI_ISL_803107                                                                                       | COVID-19 National Reference Laboratory, Pasteur Institute of Iran                                                                                                                                                 | COVID-19 National Reference Laboratory, Pasteur Institute of Iran                                                                                                                                          | Ahmadi, Z.; Azadmanjiri, S.; Azarm, A.; Fereydouni, Z.; Gouya; Hassanpour, G.; Hassanzadeh, M.; Heidari; Jalali, T.; Karami, C.; Khayatzadeh, S.; M.H.; M.M.; Mohebal, M.; Parsaei, M.; Pouriayevali; Sadjadi, M.; Sarafraz, N.; Sasani, F.; Shoja, Z.; TavakoliRad, M.; Z. and Salehi-Vaziri, M.; Zainali, M.; Zarei, Z.                                                                                                                                                                                                                                                                                         |
| EPI_ISL_5320246                                                                                      | Center of excellence for emerging and re-emerging diseases in animals, Faculty of Veterinary Science, Chulalongkorn University                                                                                    | Center of excellence for emerging and re-emerging diseases in animals, Faculty of Veterinary Science, Chulalongkorn University                                                                             | Alongkorn Amonsin; Ekapat Chamsai; Kamol Suwannakarn; Kamonpan Charoenkul; Kitikhun Udom; Navapon Techakriengkrai; Ratanaporn Tangwangvivat; Supassama Chaiyawong; Waleemas Jairak                                                                                                                                                                                                                                                                                                                                                                                                                                |
| EPI_ISL_482820                                                                                       | Centre de Recerca en Sanitat Animal (IRTA-CReSA)                                                                                                                                                                  | IrsiCaixa AIDS Research Lab                                                                                                                                                                                | A. Valencia; B. Clotet; C. Avila-Nieto; E. Vidal; G. Cantero; I. Blanco; J. Blanco; J. Carrillo; J. Rodon; J. Segalés; J. Vergara-Alert; M. Noguera-Julian; M. Parera; M. Puig; M.T. Terrón; N. Izquierdo-Useros; S. Cruz; V. Guallar                                                                                                                                                                                                                                                                                                                                                                             |
| EPI_ISL_1005699, EPI_ISL_2521766, EPI_ISL_2521767, EPI_ISL_2521769                                   | Clinical Laboratory, Vetsuisse Faculty, University of Zurich                                                                                                                                                      | Department of Biosystems Science and Engineering, ETH Zürich                                                                                                                                               | Chaoran Chen; Christian Beisel; David Dreifuss; Elodie Burcklen; Ina Nissen; Ivan Topolsky; Julia Klaus; Katharina Jahn; Lara Fuhrmann; Marina Luisa Meli; Natascha Santacroce; Niko Beerwinkel; Philipp Jablonski; Rebecca Denes; Regina Hofmann-Lehmann; Sarah Nadeau; Tanja Stadler                                                                                                                                                                                                                                                                                                                            |
| EPI_ISL_3010050                                                                                      | Cornell Diagnostic Laboratory                                                                                                                                                                                     | Diagnostic Virology Laboratory, National Veterinary Services Laboratories, USDA1920 Dayton Avenue, Ames, IA 50010, USA                                                                                     | Emily R. Love; Kerrie M. Franzen; Mary L. Killian; Mia Torchetti; Suelee Robbe-Austerman; Tod P. Stuber                                                                                                                                                                                                                                                                                                                                                                                                                                                                                                           |
| EPI_ISL_487275                                                                                       | Department of Veterinary Pathology, University of Liege - FARA                                                                                                                                                    | Department of Veterinary Pathology, University of Liege - FARA                                                                                                                                             | A.-S.; Clercx, C.; Desmecht, D.; Eloit, M.; Escriou, N.; Garigliany, M.; Giet, D.; Huon, C.; Vanlaere; van der Werf, S.                                                                                                                                                                                                                                                                                                                                                                                                                                                                                           |
| EPI_ISL_2628995                                                                                      | Department of Veterinary Public Health, Faculty of Veterinary Science, Chulalongkorn University                                                                                                                   | Department of Veterinary Public Health, Faculty of Veterinary Science, Chulalongkorn University                                                                                                            | Boonyapisitsopa, S.; Bunpapong, N.; Chaiyawong, S.; Chamsai, E.; Charoenkul, K.; Jairak, W.; Poovorawan; Surachetpong, S.; Suwannakarn, K.; Tangwangvivat, R.; Tantilertcharoen, R.; Techakriengkrai, N.; Udom, K.; Y. and Amonsin, A.                                                                                                                                                                                                                                                                                                                                                                            |
| EPI_ISL_1358217, EPI_ISL_1358218, EPI_ISL_5104522                                                    | Department of Veterinary Science, National Institute of Infectious Diseases                                                                                                                                       | Department of Veterinary Science, National Institute of Infectious Diseases                                                                                                                                | Keita Ishijima; Ken Maeda; Tsukasa Yamamoto; Yudai Kuroda                                                                                                                                                                                                                                                                                                                                                                                                                                                                                                                                                         |
| EPI_ISL_683164, EPI_ISL_683165, EPI_ISL_683166                                                       | Department of Virus and Microbiological Special Diagnostics, Statens Serum Institut, Copenhagen, Denmark                                                                                                          | Albertsen Lab, Department of Chemistry and Bioscience, Aalborg University, Denmark                                                                                                                         | Danish Covid-19 Genome Consortium                                                                                                                                                                                                                                                                                                                                                                                                                                                                                                                                                                                 |
| EPI_ISL_699506, EPI_ISL_699507, EPI_ISL_699509                                                       | Diagnostic Virology Laboratory, USDA National Veterinary Services Laboratories                                                                                                                                    | Diagnostic Virology Laboratory, USDA National Veterinary Services Laboratories                                                                                                                             | Akpalu, Y.; Auckland; Barton Behravesh, C.; C.M.; Davila, E.; E.R.; Fischer; Franzen; G.L.; Ghai; Hamer; I.B.; Jenkins-Moore, M.; K.M.; Killian; L.D.; Love; M.L.; Pauvolid-Correa, A.; R.R.; R.S.; Roundy; S.A.; Spengler, J.; Tang, W.; Torchetti, M.; Zecca                                                                                                                                                                                                                                                                                                                                                    |
| EPI_ISL_722300                                                                                       | Dutch COVID-19 response team                                                                                                                                                                                      | Erasmus Medical Center                                                                                                                                                                                     | Anne van der Linden; Annemiek van der Eijk; Bas Oude Munnink; Corine GeurtsvanKessel; David Nieuwenhuis; Emmanuelle Munger; Irina Chestakova; Marion Koopmans; Marjan Boter; Reina Sikkema; Richard Molenkamp; on behalf of the Dutch national COVID-19 response team.                                                                                                                                                                                                                                                                                                                                            |
| EPI_ISL_437349                                                                                       | Ecole nationale vétérinaire d'Alfort-laboratoire de santé animale Anses UMR 1161 de virologie ENVA-Anses-INRAE                                                                                                    | Institut Pasteur CIBU-ERI                                                                                                                                                                                  | Bernard Klonjkowski; Corinne Sailleau; Marine Dumarest; Sophie Le Poder; Stéphane Zientara                                                                                                                                                                                                                                                                                                                                                                                                                                                                                                                        |
| EPI_ISL_536400                                                                                       | Fareham Creek Veterinary Surgery                                                                                                                                                                                  | MRC-University of Glasgow Centre for Virus Research                                                                                                                                                        | Ana Da Silva Filipe; Andrew Stevenson; Brian J Willett; Bryn Tennant; Daniel G Streicker; Daniel Goldfarb; Darcy Herrity; David L Robertson and William Weir; Dawn Dunbar; Emma MacDonald; Fiona Howie; Frazer Bell; Ilaria Epifano; Lynn Stevenson; Margaret J Hosie; Michael McDonald; Natasha Johnson; Pablo R Murcia; Richard J Orton; Ruth F Jarrett; Vanessa Herder                                                                                                                                                                                                                                         |
| EPI_ISL_1218882, EPI_ISL_1218883, EPI_ISL_1218884                                                    | Florida Bureau of Public Health Laboratories                                                                                                                                                                      | Florida Bureau of Public Health Laboratories                                                                                                                                                               | Jason Blanton; Sarah Schmedes                                                                                                                                                                                                                                                                                                                                                                                                                                                                                                                                                                                     |
| EPI_ISL_2932504, EPI_ISL_2932505                                                                     | GRAM2.0, Université de Caen Normandie/Laboratoire de Virologie                                                                                                                                                    | GRAM2.0, Université de Caen Normandie/Laboratoire de Virologie                                                                                                                                             | Ar Goulh, M.; Becquart, P.; Corbet, S.; E.M.; Ferasin, H.; Ferasin, L.; Fritz, M.; Legros, V.; Leroy; Vabret, A.                                                                                                                                                                                                                                                                                                                                                                                                                                                                                                  |
| EPI_ISL_2791488, EPI_ISL_2791489, EPI_ISL_2791490                                                    | Gatuario Veterinary Clinic                                                                                                                                                                                        | Faculty of Veterinary Medicine, Universidad Peruana Cayetano Heredia                                                                                                                                       | Francesca Schiaffino                                                                                                                                                                                                                                                                                                                                                                                                                                                                                                                                                                                              |
| EPI_ISL_2932460, EPI_ISL_2932461, EPI_ISL_2932462, EPI_ISL_2932463                                   | Genome Research Unit, Animal Health Research Institute                                                                                                                                                            | Genome Research Unit, Animal Health Research Institute                                                                                                                                                     | Ahmed, H.; El-Deeb, A.; Hagag, N.; Hamdy, M.; Shaheen, M.                                                                                                                                                                                                                                                                                                                                                                                                                                                                                                                                                         |
| EPI_ISL_2696281                                                                                      | Genome Research Unit, Animal Health Research Institute                                                                                                                                                            | Genome Research Unit, Animal Health Research Institute                                                                                                                                                     | El-Deeb, A.; Hagag, N.; Hamdy, M.; M. and Ahmed, H.; Shaheen                                                                                                                                                                                                                                                                                                                                                                                                                                                                                                                                                      |
| EPI_ISL_2930559, EPI_ISL_2930561, EPI_ISL_2958980, EPI_ISL_2958981, EPI_ISL_2958984, EPI_ISL_2958985 | see above                                                                                                                                                                                                         | Diagnostic Virology Laboratory, National Veterinary Services Laboratories, USDA1920 Dayton Avenue, Ames, IA 50010, USA                                                                                     | Emily R. Love; Kerrie M. Franzen; Mary L. Killian; Mia Torchetti; Suelee Robbe-Austerman; Tod P. Stuber                                                                                                                                                                                                                                                                                                                                                                                                                                                                                                           |
| EPI_ISL_2833776                                                                                      | Istituto Zooprofilattico Sperimentale del Piemonte, Liguria e Valle d'Aosta                                                                                                                                       | Istituto di Genomica Applicata                                                                                                                                                                             | "Roberto Zoccola; Alessandro Dondo; Angelo Ferrari; Anna Maria Porzio; Bartolomeo Griglio; Chiara Beltramo; Chiara Pasqualini; Elena Bozzetta; Francesco Zappulla; Gabriele Magris; Giuseppe Ru; Maria Gloria"; Maria Silvia Gennero; Pierluigi Acutis; Simone Peletto; Slodobanka Radovic                                                                                                                                                                                                                                                                                                                        |
| EPI_ISL_2958986                                                                                      | Kansas State Veterinary Diagnostic Laboratory                                                                                                                                                                     | Diagnostic Virology Laboratory, National Veterinary Services Laboratories, USDA1920 Dayton Avenue, Ames, IA 50010, USA                                                                                     | Emily R. Love; Kerrie M. Franzen; Mary L. Killian; Mia Torchetti; Suelee Robbe-Austerman; Tod P. Stuber                                                                                                                                                                                                                                                                                                                                                                                                                                                                                                           |
| EPI_ISL_2365363                                                                                      | Katzenpraxis (Cat practice) Dr. Cat                                                                                                                                                                               | Friedrich-Loeffler-Institut                                                                                                                                                                                | Balal Sadeghi; Claudia Wylezich; Dirk Höper; Ibrahim Hagag; Jörg Balzer; Katja Beyer; Kerstin Wernike; Markus Keller; Martin Beer; Martin Groschup                                                                                                                                                                                                                                                                                                                                                                                                                                                                |
| EPI_ISL_4875726                                                                                      | Laboratorio de Diagnóstico-UNIDAD COVID- Universidad Nacional de Hurlingham                                                                                                                                       | Instituto Nacional de Tecnología Agropecuaria, CICVyA, Instituto de Biotecnología, IABIMO-CONICET, Unidad de Genómica                                                                                      | Andrea Fabiana Puebla; Andrea Pecora; Andrea Vanesa Gamarnik; Andrea Verónica Peralta; Cristian Carusso; Dario Amilcar Malacari; Javier Mas. Guido König and María José Dus Santos; Marco Cacciabue; Marina Valeria Mozgovoj; María Mora Gonzalez Lopez Ledesma; María de los Angeles Díaz; Osvaldo Rinaldi; Osvaldo Vidal; Silvia Mundo                                                                                                                                                                                                                                                                          |
| EPI_ISL_848070, EPI_ISL_848071, EPI_ISL_848083                                                       | Laboratory of Clinical Research on Dermatoozoonoses in Domestic Animals, Evandro Chagas National Institute of Infectious Diseases, Oswaldo Cruz Foundation (Fiocruz), Rio de Janeiro, RJ, Brazil.                 | Laboratory of Respiratory Viruses and Measles, Oswaldo Cruz Institute, FIOCRUZ                                                                                                                             | Alex Pauvolid-Corrêa; Alice Sampaio Barreto da Rocha; Anielle de Pina Costa; Artur Augusto Velho Mendes Junior; Ezequias Batista Martins; Fernando do Couto Motta; Guilherme Amaral Calvet; Isabella Campos Vargas de Moraes; Isabella Dib Ferreira Gremião; Lucas Oliveira Keidel; Lusielle Guimarães; Maria Ogrzewalska; Marilda Mendonça Siqueira on behalf of the Fiocruz COVID-19 Genomic Surveillance Network; Michelle Fernanda Borges da Silva; Paola Cristina Resende; Patricia Brasil; Renato Orsini Ornelas; Rodrigo Caldas Menezes; Sandro Antônio Pereira; Shanna Araujo dos Santos; Thiago C. Souza |
| EPI_ISL_717979                                                                                       | Laboratory of Microbiology and Infectious Diseases, Faculty of Veterinary Medicine, Aristotle University of Thessaloniki, University Campus, 541 24, Thessaloniki, Greece.                                        | Laboratory of Biology, Department of Medicine, Democritus University of Thrace, Alexandroupolis, Greece                                                                                                    | Bampali M.; Chaintoutis S.; Dimitriou M.; Dovas C.; Dvorilis N.; Karakasioti I.                                                                                                                                                                                                                                                                                                                                                                                                                                                                                                                                   |
| EPI_ISL_4565991                                                                                      | Laboratório de Agentes Infecciosos e Vetores -LAIVE- Bahia, Barreiras, Brazil                                                                                                                                     | Laboratório Baculovírus                                                                                                                                                                                    | Aline Belmok; Bergmann M Ribeiro; Fernando L Melo; Jaime Amorim; Josilene Pinheiro                                                                                                                                                                                                                                                                                                                                                                                                                                                                                                                                |
| EPI_ISL_6470123                                                                                      | Laboratório de Biologia Molecular, Instituto de Pesquisas Biomédicas, Hospital Naval Marçílio Dias                                                                                                                | Programa de Oncovirologia, Instituto Nacional de Câncer                                                                                                                                                    | Amílcar Tanuri; Dirlei Nico; Eduardo Siqueira; Filipe Romero Rebelo Moreira; Fábio Luis Lima Monteiro; Juliana Aparecida Souza da Paz; Juliana Domest Siqueira; Jéssica da Silva Oliveira; Karina Martins Cardoso; Leonardo Bustamante de Luna Dias; Livia Ramos Goes; Luciana Moreira Miyashiro; Marcelo Alves Soares; Raíaela da Silva Caetano; Raissa Mirella dos Santos Cunha da Costa; Shana Priscila Coutinho Barroso; Stephany Cavalcante Ferreira; Sâmila Natiane Ferreira; Vinicius Figueiredo Vizzoni                                                                                                   |
| EPI_ISL_6425547, EPI_ISL_6425548, EPI_ISL_6425549, EPI_ISL_6425550                                   | Lennon                                                                                                                                                                                                            | Bushman                                                                                                                                                                                                    | Andrew D. Marques; Aoife M. Roche; Arupa Ganguly; Ayannah S. Fitzgerald; Brendan Kelly; Elizabeth M. Lennon; Jevon Graham-Wooten; John K. Everett; Kyle Rodino; Layla A. Khatib; Mike Feldman; Olivia C. Lenz; Ronald G. Collman and Frederic Bushan; Samantha A. Whiteside; Scott Sherrill-Mix; Shantanu Reddy; Young Hwang                                                                                                                                                                                                                                                                                      |
| EPI_ISL_450406,                                                                                      | Molecular Diagnostics, Antech Diagnostics                                                                                                                                                                         | Molecular Diagnostics, Antech Diagnostics                                                                                                                                                                  | C.E.; C.M.; D. and Moroff, S.; J.L.; J.L. and Moroff, S.; Leutenegger; Lozoya; Tereski; Wyler                                                                                                                                                                                                                                                                                                                                                                                                                                                                                                                     |



|                                                                                                                                                                                           |                                                                                                                                                |                                                                                                                                                                                                 |                                                                                                                                                                                                                                                                                                                                                                                                                                |
|-------------------------------------------------------------------------------------------------------------------------------------------------------------------------------------------|------------------------------------------------------------------------------------------------------------------------------------------------|-------------------------------------------------------------------------------------------------------------------------------------------------------------------------------------------------|--------------------------------------------------------------------------------------------------------------------------------------------------------------------------------------------------------------------------------------------------------------------------------------------------------------------------------------------------------------------------------------------------------------------------------|
| EPI_ISL_450407                                                                                                                                                                            |                                                                                                                                                |                                                                                                                                                                                                 |                                                                                                                                                                                                                                                                                                                                                                                                                                |
| EPI_ISL_759858                                                                                                                                                                            | School of Public Health, The University of Hong Kong                                                                                           | School of Public Health, The University of Hong Kong                                                                                                                                            | Barrs; Brackman; C.J.; Chu; D.K.W.; E.M.W.; K.W.S.; Law; P.Y.L.; Peiris, M.; Perera; R.A.P.M. and Sit; T.H.C.; Tam; To; V.R.; V.Y.T.; Yu                                                                                                                                                                                                                                                                                       |
| EPI_ISL_3128536                                                                                                                                                                           | Sciensano - Animal diseases                                                                                                                    | Sciensano - Animal diseases                                                                                                                                                                     | Ann Brigitte Cay; Anne Declercq; Elisabeth Mathijs; Frank Vandebussche; Nadège Balmelle                                                                                                                                                                                                                                                                                                                                        |
| EPI_ISL_1525089                                                                                                                                                                           | Sonora Quest Laboratories                                                                                                                      | TGen North                                                                                                                                                                                      | Ashlyn Pfeiffer; Chris French; Darrin Lemmer; Dave Engelthaler; Hayley Yaglom; Heather Centner; Jolene Bowers; The Arizona COVID Genomics Union (ACGU)                                                                                                                                                                                                                                                                         |
| EPI_ISL_421531                                                                                                                                                                            | State Key Laboratory of Agricultural Microbiology                                                                                              | State Key Laboratory of Agricultural Microbiology                                                                                                                                               | Meilin Jin                                                                                                                                                                                                                                                                                                                                                                                                                     |
| EPI_ISL_1315075                                                                                                                                                                           | Texas A&M College of Veterinary Medicine & Biomedical Sciences via Wisconsin Veterinary Diagnostic Laboratory, University of Wisconsin-Madison | Diagnostic Virology Laboratory, National Veterinary Services Laboratories, USDA1920 Dayton Avenue, Ames, IA 50010, USA                                                                          | Ailam Lim; Casey Barton Behravesh; Emily R. Love; Gabriel L. Hamer; Kerrie M. Franzen; Mary L. Killian; Ria R. Ghai; Sarah A. Hamer                                                                                                                                                                                                                                                                                            |
| EPI_ISL_2100634                                                                                                                                                                           | The Laboratory of Biosafety with Pathogens Collection The Republican Research and Practical Center for Epidemiology and Microbiology (RRPCEM)  | Laboratory for HIV and opportunistic infections diagnosis The Republican Research and Practical Center for Epidemiology and Microbiology (RRPCEM)                                               | Anatoli Krasko; Artur Akhremchuk; Elena Gasich; Ilarion Kupryanov; Iryna Subotsina; Kirill Bulda; Larysa Radzienava 19 ноябрь; Leonid Valentovich; Olga Klimovoch; Olga Saleuskaya; Sergei Semenov                                                                                                                                                                                                                             |
| EPI_ISL_3128554                                                                                                                                                                           | Thompson Bishop Sparks State Diagnostic Laboratory                                                                                             | Diagnostic Virology Laboratory, National Veterinary Services Laboratories, USDA1920 Dayton Avenue, Ames, IA 50010, USA                                                                          | Emily R. Love; Kerrie M. Franzen; Mary L. Killian; Mia Torchetti; Suelee Robbe-Austerman; Tod P. Stuber                                                                                                                                                                                                                                                                                                                        |
| EPI_ISL_962892                                                                                                                                                                            | ULSS 03 Venezia                                                                                                                                | Istituto Zooprofilattico Sperimentale delle Venezie                                                                                                                                             | Bellinati Laura; Bonfante Francesco; Bortolami Alessio; Ceglie Letizia; Fincato Alice; Guadagno Carmine; Lucchese L; Mason Nicoletta; Mazzotta Elisa; Mion Monica; Monne Isabella; Natale Alda; Pastori Ambra; Quaranta Erika; Stefani Annalisa; Terregino Calogero                                                                                                                                                            |
| EPI_ISL_1914577                                                                                                                                                                           | Unidad de diagnóstico COVID-19, Facultad de Ciencias Veterinarias (FCV), Universidad Nacional de La Plata (UNLP), Argentina.                   | Área de Secuenciación del Laboratorio de Virología del Hospital de Niños Dr. Ricardo Gutierrez on behalf of 'Proyecto Argentino Interinstitucional de genómica de SARS-CoV-2' (PAIS Consortium) | Carlos Javier Panei; David Di Lulio; Fernando David Rivero; Gastón More; Juan Manuel Unzaga; Laura Elena Valinotto; Lorena De Felice; Marcelo Pecoraro; Marcos Salina; Mariana Viegas; María Emilia Bravi; Mercedes Soledad Nabaes Jodar; Nadia Analía Fuentealba                                                                                                                                                              |
| EPI_ISL_2339859                                                                                                                                                                           | Universidad de Cordoba, Montería, Colombia                                                                                                     | Centro de Investigaciones en Microbiología y Biotecnología-UR (CIMBIUR), Facultad de Ciencias Naturales, Universidad del Rosario, Bogotá, Colombia                                              | Ader Alemán; Alejandra García; Alfonso Calderón; Andrés Díaz; Bertha Gastelbondo; Camilo Guzmán; Katy Martínez; Evelin Garay; Germán Arrieta; Hector Contreras; Hector Serrano; Jorge Miranda; José Berrocal; Juan David Ramírez; Ketty Galeano; Luz H. Patiño; María Auxiliadora Badillo; Marina Muñoz; Nathalia Ballesteros; Ricardo Rivero; Salim Mattar; Sergio Castañeda; Veronica Contreras; Yesica Botero; Yesica Lopez |
| EPI_ISL_1328819,<br>EPI_ISL_1328821,<br>EPI_ISL_1328824,<br>EPI_ISL_1328826                                                                                                               | VEBIO                                                                                                                                          | GRAM2.0, Université de Caen Normandie / Laboratoire de Virologie, CHU de Caen                                                                                                                   | Astrid VABRET; Estelle LEPERCHOIS; Matthieu FRITZ; Meriadeg AR GOUILH; Nicolas NESI                                                                                                                                                                                                                                                                                                                                            |
| EPI_ISL_2674898                                                                                                                                                                           | Veterinarski Fakultet Sveučilišta u Zagrebu                                                                                                    | Hrvatski zavod za javno zdravstvo                                                                                                                                                               | Irena Tabain; Ivana Ferenčak                                                                                                                                                                                                                                                                                                                                                                                                   |
| EPI_ISL_5321779                                                                                                                                                                           | Veterinary clinical diagnostic laboratory                                                                                                      | SSiGMol                                                                                                                                                                                         | Cabrera Jaramillo, A.; D. and Gutierrez; Gonzalez; L.A                                                                                                                                                                                                                                                                                                                                                                         |
| EPI_ISL_5155468                                                                                                                                                                           | Veterinary clinical diagnostic laboratory                                                                                                      | Servicio de Secuenciación y Análisis Molecular -SSiGMol                                                                                                                                         | Cabrera Jaramillo, A.; D. and Gutierrez; Gonzalez; L.A.                                                                                                                                                                                                                                                                                                                                                                        |
| EPI_ISL_873210                                                                                                                                                                            | Virology, Ecole Nationale Veterinaire de Toulouse                                                                                              | Virology, Ecole Nationale Veterinaire de Toulouse                                                                                                                                               | Bessiere, P.; Cadiergues; Croville, G.; Fusade-Boyer, M.; J.-L.; Lebre, L.; M.-C. and Guerin; Walch, M.                                                                                                                                                                                                                                                                                                                        |
| EPI_ISL_811147,<br>EPI_ISL_873040                                                                                                                                                         | WHO National Influenza Centre Russian Federation                                                                                               | WHO National Influenza Centre Russian Federation                                                                                                                                                | Andrey Komissarov; Anna Ivanova; Artem Fadeev; Daria Danilenko; Dmitry Bazhenov; Dmitry Lioznov; Elena Nabieva; Georgii Bazykin; Kseniya Safina; Kseniya Komissarova; Maxim Burlakov; Mikhail Bakaev                                                                                                                                                                                                                           |
| EPI_ISL_2930556, EPI_ISL_2930557, EPI_ISL_3010053, EPI_ISL_3010054, EPI_ISL_3010055, EPI_ISL_3128552, EPI_ISL_3128558, EPI_ISL_3128559, EPI_ISL_3148878, EPI_ISL_3148879, EPI_ISL_6639377 |                                                                                                                                                |                                                                                                                                                                                                 |                                                                                                                                                                                                                                                                                                                                                                                                                                |
| see above                                                                                                                                                                                 | Wisconsin Veterinary Diagnostic Laboratory                                                                                                     | Diagnostic Virology Laboratory, National Veterinary Services Laboratories, USDA1920 Dayton Avenue, Ames, IA 50010, USA                                                                          | Emily R. Love; Kerrie M. Franzen; Mary L. Killian; Mia Torchetti; Suelee Robbe-Austerman; Tod P. Stuber                                                                                                                                                                                                                                                                                                                        |
| EPI_ISL_3128556                                                                                                                                                                           | Zoetis Reference Laboratories                                                                                                                  | Diagnostic Virology Laboratory, National Veterinary Services Laboratories, USDA1920 Dayton Avenue, Ames, IA 50010, USA                                                                          | Emily R. Love; Kerrie M. Franzen; Mary L. Killian; Mia Torchetti; Suelee Robbe-Austerman; Tod P. Stuber                                                                                                                                                                                                                                                                                                                        |
| EPI_ISL_483063,<br>EPI_ISL_483064                                                                                                                                                         | unknown                                                                                                                                        | Virology, Ecole Nationale Veterinaire de Toulouse                                                                                                                                               | Bessiere, P.; Cadiergues; Croville, G.; Dubois, M.; Guerin; Izopet, J.; J.-L.; M.-C.; Walch, M.                                                                                                                                                                                                                                                                                                                                |

We gratefully acknowledge the following Authors from the Originating laboratories responsible for obtaining the specimens, as well as the Submitting laboratories where the genome data were generated and shared via GISAID, on which this research is based.

All Submitters of data may be contacted directly via [www.gisaid.org](http://www.gisaid.org)

Authors are sorted alphabetically.

| <b>Accession ID</b> | <b>Originating Laboratory</b>                                                            | <b>Submitting Laboratory</b>                                                                                                                 | <b>Authors</b>                                                                                                                                                                                                                             |
|---------------------|------------------------------------------------------------------------------------------|----------------------------------------------------------------------------------------------------------------------------------------------|--------------------------------------------------------------------------------------------------------------------------------------------------------------------------------------------------------------------------------------------|
| EPI_ISL_3730369     | National HIV Reference Laboratory, Ministry of Health, Public Health Institute of Malawi | CERI, Centre for Epidemic Response and Innvoation, Stellenbosch University and KRISP, KZN Research Innovation and Sequencing Platform, UKZN. | Auld A; Chilima B; Chiwaula M; Emmanuel SJ; Giandhari J; Kaba M; Kampira E; Kasambara W; Kim L; Lessells R; Maida A; Mvula B; Mwangomba W; Naidoo Y; Panja L; Pillay S; Tegally H; Tshiabuila Derek; Wadonda N; Wilkinson E; de Oliveira T |

We gratefully acknowledge the following Authors from the Originating laboratories responsible for obtaining the specimens, as well as the Submitting laboratories where the genome data were generated and shared via GISAID, on which this research is based.

All Submitters of data may be contacted directly via [www.gisaid.org](http://www.gisaid.org)

Authors are sorted alphabetically.

| Accession ID    | Originating Laboratory                                                                                                                        | Submitting Laboratory                                                                                                                             | Authors                                                                                                                                                                                   |
|-----------------|-----------------------------------------------------------------------------------------------------------------------------------------------|---------------------------------------------------------------------------------------------------------------------------------------------------|-------------------------------------------------------------------------------------------------------------------------------------------------------------------------------------------|
| EPI_ISL_5781754 | Bronson Animal Disease Diagnostic Laboratory                                                                                                  | Diagnostic Virology Laboratory, National Veterinary Services Laboratories, USDA1920 Dayton Avenue, Ames, IA 50010, USA                            | Emily R. Love; Kerrie M. Franzen; Mary L. Killian; Mia Torchetti; Suelee Robbe-Austerman; Tod P. Stuber                                                                                   |
| EPI_ISL_2521999 | The Laboratory of Biosafety with Pathogens Collection The Republican Research and Practical Center for Epidemiology and Microbiology (RRPCEM) | Laboratory for HIV and opportunistic infections diagnosis The Republican Research and Practical Center for Epidemiology and Microbiology (RRPCEM) | Anatoli Krasko; Artur Akhremchuk; Elena Gasich; Ilarion Kupryianav; Iryna Subotsina; Kirill Bulda; Larysa Radzienava; Leonid Valentovich; Olga Klimovich; Olga Saleuskaya; Sergei Semenov |
| EPI_ISL_1490186 | University of Ljubljana, Faculty of Veterinary Medicine                                                                                       | Institute of Microbiology and Immunology, Faculty of Medicine, University of Ljubljana                                                            | Ana Kočevar; Brigita Slavec; Jožko Račnik; Mario Poljak; Matic Brvar; Milan Matko; Miša Korva; Olga Zorman Rojs; Samo Zakotnik; Tatjana Avšič - Županc; Tomaž Mark Zorec                  |



EPI\_ISL\_2896203, EPI\_ISL\_2896204,  
EPI\_ISL\_2896205, EPI\_ISL\_2896206

Washington Animal Disease Diagnostic Laboratory

Diagnostic Virology Laboratory, National Veterinary Services Laboratories, USDA1920 Dayton Avenue,  
Ames, IA 50010, USA

Emily R. Love; Kerrie M. Franzen; Mary L. Killian; Mia Torchetti; Suelee Robbe-Austerman; Tod P. Stuber

EPI\_ISL\_1014941, EPI\_ISL\_1014942, EPI\_ISL\_1014943, EPI\_ISL\_1014944, EPI\_ISL\_1014945, EPI\_ISL\_1014946, EPI\_ISL\_1014947, EPI\_ISL\_1014948, EPI\_ISL\_1014949, EPI\_ISL\_1014950, EPI\_ISL\_1014951, EPI\_ISL\_1014952, EPI\_ISL\_1014953, EPI\_ISL\_1014954, EPI\_ISL\_1014955, EPI\_ISL\_1014956, EPI\_ISL\_1014957, EPI\_ISL\_1014958, EPI\_ISL\_1014959, EPI\_ISL\_1014960, EPI\_ISL\_1014961, EPI\_ISL\_1014962,  
EPI\_ISL\_1014963, EPI\_ISL\_1014964, EPI\_ISL\_1014965, EPI\_ISL\_1014966, EPI\_ISL\_1014967, EPI\_ISL\_1014968, EPI\_ISL\_1014969, EPI\_ISL\_1014970, EPI\_ISL\_1014971, EPI\_ISL\_1014972, EPI\_ISL\_1014973, EPI\_ISL\_1014974, EPI\_ISL\_1014975, EPI\_ISL\_1014976, EPI\_ISL\_1014977, EPI\_ISL\_1014978, EPI\_ISL\_1014979, EPI\_ISL\_1014980, EPI\_ISL\_1014981, EPI\_ISL\_1014982, EPI\_ISL\_1014983, EPI\_ISL\_1014984,  
EPI\_ISL\_1014985, EPI\_ISL\_1014986, EPI\_ISL\_1014987

see above

Wisconsin Department of Agriculture, Trade, and Consumer  
Protection

Pathogen Discovery, Respiratory Viruses Branch, Division of Viral Diseases, Centers for Disease  
Control and Prevention

Anna Montmayeur; Anna Uehara; Brian Lynch; Clinton R. Paden; Haibin Wang; Han Jia Ng; Jing Zhang; Krista Queen; Peter Cook; Rachel Marine; Suxiang Tong; Yan Li; Ying Tao

EPI\_ISL\_2834698, EPI\_ISL\_2834699,  
EPI\_ISL\_2834700, EPI\_ISL\_2834701,  
EPI\_ISL\_2834702

Wisconsin Veterinary Diagnostic Laboratory

Diagnostic Virology Laboratory, National Veterinary Services Laboratories, USDA1920 Dayton Avenue,  
Ames, IA 50010, USA

Emily R. Love; Kerrie M. Franzen; Mary L. Killian; Mia Torchetti; Suelee Robbe-Austerman; Tod P. Stuber

We gratefully acknowledge the following Authors from the Originating laboratories responsible for obtaining the specimens, as well as the Submitting laboratories where the genome data were generated and shared via GISAID, on which this research is based.

All Submitters of data may be contacted directly via [www.gisaid.org](http://www.gisaid.org)

Authors are sorted alphabetically.

| Accession ID                                                                                                                                                                                           | Originating Laboratory                                                                                                  | Submitting Laboratory                                                                                                                                                                                                                            | Authors                                                                                                                                                                                                                                                                                                                                                                                                                                                                                                                                                      |
|--------------------------------------------------------------------------------------------------------------------------------------------------------------------------------------------------------|-------------------------------------------------------------------------------------------------------------------------|--------------------------------------------------------------------------------------------------------------------------------------------------------------------------------------------------------------------------------------------------|--------------------------------------------------------------------------------------------------------------------------------------------------------------------------------------------------------------------------------------------------------------------------------------------------------------------------------------------------------------------------------------------------------------------------------------------------------------------------------------------------------------------------------------------------------------|
| EPI_ISL_3376985, EPI_ISL_3376991<br>EPI_ISL_2803214                                                                                                                                                    | Borås Djurpark AB<br>Centre for Dengue Research and AICBU, Department of Immunology and Molecular Medicine              | National Veterinary Institute<br>Centre for Dengue Research and AICBU, Department of Immunology and Molecular Medicine                                                                                                                           | Erika Karlstam; Hanne Friis; Helen T. Michael; Karl Ståhl; Katarina Näslund; Leif Dotevall; Linda Forslund; Siamak Zohari and Aleksija Neimanis; Therese Hård; Ulrika Larsson Pettersson<br>Aresha Mananper; Chandima Jeewandara; Deshan Madhusanka; Deshni Jayathilaka; Diyanath Ranasinghe; Gathsaurie Neelika Malavige; N P Sunil Chandra                                                                                                                                                                                                                 |
| EPI_ISL_6088015, EPI_ISL_6088016, EPI_ISL_6088018, EPI_ISL_6088025, EPI_ISL_6088026, EPI_ISL_6088034, EPI_ISL_6088040, EPI_ISL_6088041, EPI_ISL_6088044, EPI_ISL_6088046, EPI_ISL_6088051<br>see above | Colorado State University Veterinary Diagnostic Laboratory<br>Cornell Diagnostic Laboratory                             | Diagnostic Virology Laboratory, National Veterinary Services Laboratories, USDA1920 Dayton Avenue, Ames, IA 50010, USA<br>Diagnostic Virology Laboratory, National Veterinary Services Laboratories, USDA1920 Dayton Avenue, Ames, IA 50010, USA | Emily R. Love; Kerrie M. Franzen; Mary L. Killian; Mia Torchetti; Suelee Robbe-Austerman; Tod P. Stuber<br>Emily R. Love; Kerrie M. Franzen; Mary L. Killian; Mia Torchetti; Suelee Robbe-Austerman; Tod P. Stuber                                                                                                                                                                                                                                                                                                                                           |
| EPI_ISL_5867584, EPI_ISL_5867585                                                                                                                                                                       | Cornell Diagnostic Laboratory                                                                                           | Diagnostic Virology Laboratory, National Veterinary Services Laboratories, USDA1920 Dayton Avenue, Ames, IA 50010, USA                                                                                                                           | Emily R. Love; Kerrie M. Franzen; Mary L. Killian; Mia Torchetti; Suelee Robbe-Austerman; Tod P. Stuber                                                                                                                                                                                                                                                                                                                                                                                                                                                      |
| EPI_ISL_6088056, EPI_ISL_6088063, EPI_ISL_6088070, EPI_ISL_6088078                                                                                                                                     | Diagnostic Virology Laboratory, National Veterinary Services Laboratories, USDA1920 Dayton Avenue, Ames, IA 50010, USA  | Diagnostic Virology Laboratory, National Veterinary Services Laboratories, USDA1920 Dayton Avenue, Ames, IA 50010, USA                                                                                                                           | Emily R. Love; Kerrie M. Franzen; Mary L. Killian; Mia Torchetti; Suelee Robbe-Austerman; Tod P. Stuber                                                                                                                                                                                                                                                                                                                                                                                                                                                      |
| EPI_ISL_2821077, EPI_ISL_2821078, EPI_ISL_2821079, EPI_ISL_2821080<br>EPI_ISL_7016463                                                                                                                  | National Institute of High Security Animal Diseases<br>National Parks Board, Centre for Animal & Veterinary Sciences    | National Institute of High Security Animal Diseases<br>National Parks Board, Centre for Animal & Veterinary Sciences                                                                                                                             | Anamika Mishra; Ashutosh Aasdev; Ashwin A Raut; Chandan K Dubey; Dipesh K Nayak; Meghna Tripathi; Naveen Kumar; Pradeep N Gandhale; Sandeep Bhatia; Sushil Tripathi; Vijendra P Singh<br>Adrian; Charlene; Fernandez; Huangfu; Jasmine; Ong; Tan; Taoqi; Wang; Yifan                                                                                                                                                                                                                                                                                         |
| EPI_ISL_3098882, EPI_ISL_3098883, EPI_ISL_3098884, EPI_ISL_3098885<br>EPI_ISL_5899817                                                                                                                  | Nehru Zoological Park<br>Ohio Animal Disease Diagnostic Laboratory                                                      | CSIR-Centre for Cellular and Molecular Biology<br>Diagnostic Virology Laboratory, National Veterinary Services Laboratories, USDA1920 Dayton Avenue, Ames, IA 50010, USA                                                                         | Amareshwar Vodapalli; Ara Sreenivas; Archana Bharadwaj Siva; B Himarsi; B. Sambasiva Rao; Divya Tej Sowpati; Jandhyala Sai Krishna; Karthik Bharadwaj Tallapaka; Karthikeyan Vasudevan; Lamuk Zaveri; Md Abdul Hakeem; Onkar Kulkarni; Payel Mukherjee; Priya Nurkurthy; Rakesh K Mishra; Shreekanth Verma; Sofia Banu; Sumedha Avadhanula; Tulasi Nagabandi; Valli Nagalakshmi Undamatla; Vidhyadhari Methuku<br>Emily R. Love; Kerrie M. Franzen; Mary L. Killian; Mia Torchetti; Suelee Robbe-Austerman; Tod P. Stuber                                    |
| EPI_ISL_1497613<br>EPI_ISL_2928451                                                                                                                                                                     | State Veterinary Institute Prague<br>Texas Veterinary Medical Diagnostic Laboratory                                     | State Veterinary Institute Prague<br>Diagnostic Virology Laboratory, National Veterinary Services Laboratories, USDA1920 Dayton Avenue, Ames, IA 50010, USA                                                                                      | A; Cernikova; L; M; Nagy; Stara<br>Emily R. Love; Kerrie M. Franzen; Mary L. Killian; Mia Torchetti; Suelee Robbe-Austerman; Tod P. Stuber                                                                                                                                                                                                                                                                                                                                                                                                                   |
| EPI_ISL_5886784, EPI_ISL_5886785                                                                                                                                                                       | USDA APHIS VS                                                                                                           | Diagnostic Virology Laboratory, National Veterinary Services Laboratories, USDA1920 Dayton Avenue, Ames, IA 50010, USA                                                                                                                           | Emily R. Love; Kerrie M. Franzen; Mary L. Killian; Mia Torchetti; Suelee Robbe-Austerman; Tod P. Stuber                                                                                                                                                                                                                                                                                                                                                                                                                                                      |
| EPI_ISL_2928452, EPI_ISL_5899818, EPI_ISL_5937175, EPI_ISL_5937176, EPI_ISL_5937177<br>EPI_ISL_6639383                                                                                                 | Veterinary Diagnostic Laboratory University of Illinois at Urbana-Champaign<br>Veterinary Medical Diagnostic Laboratory | Diagnostic Virology Laboratory, National Veterinary Services Laboratories, USDA1920 Dayton Avenue, Ames, IA 50010, USA<br>Diagnostic Virology Laboratory, National Veterinary Services Laboratories, USDA1920 Dayton Avenue, Ames, IA 50010, USA | Emily R. Love; Kerrie M. Franzen; Mary L. Killian; Mia Torchetti; Suelee Robbe-Austerman; Tod P. Stuber<br>Emily R. Love; Kerrie M. Franzen; Mary L. Killian; Mia Torchetti; Suelee Robbe-Austerman; Tod P. Stuber                                                                                                                                                                                                                                                                                                                                           |
| EPI_ISL_566036, EPI_ISL_566037, EPI_ISL_566038, EPI_ISL_566044                                                                                                                                         | Wildlife Conservation Society, Bronx Zoo                                                                                | Diagnostic Virology Laboratory, United States Department of Agriculture, National Veterinary Services Laboratories, Population Medicine and Diagnostic Sciences, Cornell University                                                              | B.D.; Bartlett; Calle; Cardia Caserta, L.; Caserta; Cronk; D.C.; D.G.; Delaney; Diei; Elvinger; F.; Fang, Y.; Farnzen, K.; Frederikson, R.; Goodman, L.; Goodrich, E.; Hines Bergeson, N.; Ingerman, K.; Ivancic, M.; J.M.; Jenkin-Moore, M.; Killian; Kuzmin, I.; L.C.; Laverack, M.; M.A.; M.K.; M.L.; M.R.; Mauldin; Mauldin, M.; McAltoose, D.; McCann, C.; Mitchell; Mozingo, K.; Olmstead, C.; P.K.; P.P.; Queen, K.; S.L.; Slavinski, S.; Smith, Stokol, T.; Sykes, Terio, K.; Thomas, P.; Tong, S.; Torchetti; Wang, H.; Wang, L.; Yuan, F.; Zec, S. |
| EPI_ISL_6261983, EPI_ISL_6261987, EPI_ISL_6261989<br>see above                                                                                                                                         | ZARV, Department Medical Virology, University of Pretoria<br>Zoo Barcelona   IRTA-CReSA                                 | ZARV, Department Medical Virology, University of Pretoria<br>IrsiCaixa                                                                                                                                                                           | Adriano Mendes; Amy Strydom; Katja Koepfel; Lia Rotherham and Marietjie Venter<br>B. Clotet; F. Català-Moll; H. Fernández-Bellón; J. Vergara-Alert; J.Rodon; L. Fernández-Bastit; M. Casadellà; M. Noguera-Julian; M. Parera; R. Paredes                                                                                                                                                                                                                                                                                                                     |

We gratefully acknowledge the following Authors from the Originating laboratories responsible for obtaining the specimens, as well as the Submitting laboratories where the genome data were generated and shared via GISAID, on which this research is based.

All Submitters of data may be contacted directly via [www.gisaid.org](http://www.gisaid.org)

Authors are sorted alphabetically.

| <b>Accession ID</b> | <b>Originating Laboratory</b> | <b>Submitting Laboratory</b>             | <b>Authors</b>                                                                                                                                                                                                                                                                                                                                                                                                                                            |
|---------------------|-------------------------------|------------------------------------------|-----------------------------------------------------------------------------------------------------------------------------------------------------------------------------------------------------------------------------------------------------------------------------------------------------------------------------------------------------------------------------------------------------------------------------------------------------------|
| EPI_ISL_549487      | Quadram Institute Bioscience  | COVID-19 Genomics UK (COG-UK) Consortium | Alexander J Trotter; Alison E. Mather; Alp Aydin; Ana P. Tedim; Anastasia Kolyva; Andrew Bell; Andrew J. Page; Claire Stuart; Dave J. Baker; Gemma L. Kay; John Wain; Justin O'Grady; Leonardo de Oliveira Martins; Lizzie Meadows; Maria Diaz; Mark Webber; Muhammed Yasir; Nabil-Fareed Alikhan; Ngozi Elumogo; Nicholas M. Thomson; Rachael Stanley; Rachel Gilroy; Reenesh Prakash; Samir Dervisevic; Samuel Bloomfield; Steven Rudder; Thanh Le-Viet |

We gratefully acknowledge the following Authors from the Originating laboratories responsible for obtaining the specimens, as well as the Submitting laboratories where the genome data were generated and shared via GISAID, on which this research is based.

All Submitters of data may be contacted directly via [www.gisaid.org](http://www.gisaid.org)

Authors are sorted alphabetically.

| <b>Accession ID</b>                                                | <b>Originating Laboratory</b>                                               | <b>Submitting Laboratory</b>                                                                                           | <b>Authors</b>                                                                                                                             |
|--------------------------------------------------------------------|-----------------------------------------------------------------------------|------------------------------------------------------------------------------------------------------------------------|--------------------------------------------------------------------------------------------------------------------------------------------|
| EPI_ISL_862722, EPI_ISL_6257967                                    | San Diego County Public Health Laboratory                                   | Andersen lab at Scripps Research                                                                                       | Brett Austin; Jovan Shephard; SEARCH Alliance San Diego with Ashleigh Murphy and Brett Austin; SEARCH Alliance San Diego with Tracy Basler |
| EPI_ISL_1497615, EPI_ISL_1497617                                   | State Veterinary Institute Prague                                           | State Veterinary Institute Prague                                                                                      | A; Cernikova; L; M; Nagy; Stara                                                                                                            |
| EPI_ISL_5850331, EPI_ISL_5867579, EPI_ISL_5867581, EPI_ISL_5867582 | University of Georgia College of Veterinary Medicine                        | Diagnostic Virology Laboratory, National Veterinary Services Laboratories, USDA1920 Dayton Avenue, Ames, IA 50010, USA | Emily R. Love; Kerrie M. Franzen; Mary L. Killian; Mia Torchetti; Suelee Robbe-Austerman; Tod P. Stuber                                    |
| EPI_ISL_5899810, EPI_ISL_5899811, EPI_ISL_5899812                  | Veterinary Diagnostic Laboratory University of Illinois at Urbana-Champaign | Diagnostic Virology Laboratory, National Veterinary Services Laboratories, USDA1920 Dayton Avenue, Ames, IA 50010, USA | Emily R. Love; Kerrie M. Franzen; Mary L. Killian; Mia Torchetti; Suelee Robbe-Austerman; Tod P. Stuber                                    |



We gratefully acknowledge the following Authors from the Originating laboratories responsible for obtaining the specimens, as well as the Submitting laboratories where the genome data were generated and shared via GISAID, on which this research is based.

All Submitters of data may be contacted directly via [www.gisaid.org](http://www.gisaid.org)

Authors are sorted alphabetically.

| Accession ID    | Originating Laboratory                                                             | Submitting Laboratory  | Authors                                                                                                                                                                                                                                                                                                                                                             |
|-----------------|------------------------------------------------------------------------------------|------------------------|---------------------------------------------------------------------------------------------------------------------------------------------------------------------------------------------------------------------------------------------------------------------------------------------------------------------------------------------------------------------|
| EPI_ISL_4003132 | Central Laboratory, Bureau of Public Health (BOG) and Academic Hospital Paramaribo | Erasmus Medical Center | Bas B Oude Munnink; Cherise Beek; Consuella Partowidjojo; Dion Gajadin; Ed PF IJzerman; Emmanuelle Munger; Gary Gummels; Ingrid SK Krishnadath; Lycke Woittiez; Marion PG Koopmans; Mireille Van de Veer; Phyllis Pinas; Princes Wongsowidjojo; Radjesh Ori; Ranisha Doerbalie; Rohma Banwari; Soeradj Harkisoen; Stephen Vreden; Tilotmadebie Ramlal; Verne Nanhoe |

We gratefully acknowledge the following Authors from the Originating laboratories responsible for obtaining the specimens, as well as the Submitting laboratories where the genome data were generated and shared via GISAID, on which this research is based.

All Submitters of data may be contacted directly via [www.gisaid.org](http://www.gisaid.org)

Authors are sorted alphabetically.

| Accession ID                                                                                                                                                                                           | Originating Laboratory                                                                                                  | Submitting Laboratory                                                                                                                                                                                                                            | Authors                                                                                                                                                                                                                                                                                                                                                                                                                                                                                                                                                      |
|--------------------------------------------------------------------------------------------------------------------------------------------------------------------------------------------------------|-------------------------------------------------------------------------------------------------------------------------|--------------------------------------------------------------------------------------------------------------------------------------------------------------------------------------------------------------------------------------------------|--------------------------------------------------------------------------------------------------------------------------------------------------------------------------------------------------------------------------------------------------------------------------------------------------------------------------------------------------------------------------------------------------------------------------------------------------------------------------------------------------------------------------------------------------------------|
| EPI_ISL_3376985, EPI_ISL_3376991<br>EPI_ISL_2803214                                                                                                                                                    | Borås Djurpark AB<br>Centre for Dengue Research and AICBU, Department of Immunology and Molecular Medicine              | National Veterinary Institute<br>Centre for Dengue Research and AICBU, Department of Immunology and Molecular Medicine                                                                                                                           | Erika Karlstam; Hanne Friis; Helen T. Michael; Karl Ståhl; Katarina Näslund; Leif Dotevall; Linda Forslund; Siamak Zohari and Aleksija Neimanis; Therese Hård; Ulrika Larsson Pettersson<br>Aresha Mananper; Chandima Jeewandara; Deshan Madhusanka; Deshni Jayathilaka; Diyanath Ranasinghe; Gathsaurie Neelika Malavige; N P Sunil Chandra                                                                                                                                                                                                                 |
| EPI_ISL_6088015, EPI_ISL_6088016, EPI_ISL_6088018, EPI_ISL_6088025, EPI_ISL_6088026, EPI_ISL_6088034, EPI_ISL_6088040, EPI_ISL_6088041, EPI_ISL_6088044, EPI_ISL_6088046, EPI_ISL_6088051<br>see above | Colorado State University Veterinary Diagnostic Laboratory<br>Cornell Diagnostic Laboratory                             | Diagnostic Virology Laboratory, National Veterinary Services Laboratories, USDA1920 Dayton Avenue, Ames, IA 50010, USA<br>Diagnostic Virology Laboratory, National Veterinary Services Laboratories, USDA1920 Dayton Avenue, Ames, IA 50010, USA | Emily R. Love; Kerrie M. Franzen; Mary L. Killian; Mia Torchetti; Suelee Robbe-Austerman; Tod P. Stuber<br>Emily R. Love; Kerrie M. Franzen; Mary L. Killian; Mia Torchetti; Suelee Robbe-Austerman; Tod P. Stuber                                                                                                                                                                                                                                                                                                                                           |
| EPI_ISL_5867584, EPI_ISL_5867585                                                                                                                                                                       | Cornell Diagnostic Laboratory                                                                                           | Diagnostic Virology Laboratory, National Veterinary Services Laboratories, USDA1920 Dayton Avenue, Ames, IA 50010, USA                                                                                                                           | Emily R. Love; Kerrie M. Franzen; Mary L. Killian; Mia Torchetti; Suelee Robbe-Austerman; Tod P. Stuber                                                                                                                                                                                                                                                                                                                                                                                                                                                      |
| EPI_ISL_6088056, EPI_ISL_6088063, EPI_ISL_6088070, EPI_ISL_6088078                                                                                                                                     | Diagnostic Virology Laboratory, National Veterinary Services Laboratories, USDA1920 Dayton Avenue, Ames, IA 50010, USA  | Diagnostic Virology Laboratory, National Veterinary Services Laboratories, USDA1920 Dayton Avenue, Ames, IA 50010, USA                                                                                                                           | Emily R. Love; Kerrie M. Franzen; Mary L. Killian; Mia Torchetti; Suelee Robbe-Austerman; Tod P. Stuber                                                                                                                                                                                                                                                                                                                                                                                                                                                      |
| EPI_ISL_2821077, EPI_ISL_2821078, EPI_ISL_2821079, EPI_ISL_2821080<br>EPI_ISL_7016463                                                                                                                  | National Institute of High Security Animal Diseases<br>National Parks Board, Centre for Animal & Veterinary Sciences    | National Institute of High Security Animal Diseases<br>National Parks Board, Centre for Animal & Veterinary Sciences                                                                                                                             | Anamika Mishra; Ashutosh Aasdev; Ashwin A Raut; Chandan K Dubey; Dipesh K Nayak; Meghna Tripathi; Naveen Kumar; Pradeep N Gandhale; Sandeep Bhatia; Sushil Tripathi; Vijendra P Singh<br>Adrian; Charlene; Fernandez; Huangfu; Jasmine; Ong; Tan; Taoqi; Wang; Yifan                                                                                                                                                                                                                                                                                         |
| EPI_ISL_3098882, EPI_ISL_3098883, EPI_ISL_3098884, EPI_ISL_3098885<br>EPI_ISL_5899817                                                                                                                  | Nehru Zoological Park<br>Ohio Animal Disease Diagnostic Laboratory                                                      | CSIR-Centre for Cellular and Molecular Biology<br>Diagnostic Virology Laboratory, National Veterinary Services Laboratories, USDA1920 Dayton Avenue, Ames, IA 50010, USA                                                                         | Amareshwar Vodapalli; Ara Sreenivas; Archana Bharadwaj Siva; B Himarsi; B. Sambasiva Rao; Divya Tej Sowpati; Jandhyala Sai Krishna; Karthik Bharadwaj Tallapaka; Karthikeyan Vasudevan; Lamuk Zaveri; Md Abdul Hakeem; Onkar Kulkarni; Payel Mukherjee; Priya Nurkurthy; Rakesh K Mishra; Shreekanth Verma; Sofia Banu; Sumedha Avadhanula; Tulasi Nagabandi; Valli Nagalakshmi Undamatla; Vidhyadhari Methuku<br>Emily R. Love; Kerrie M. Franzen; Mary L. Killian; Mia Torchetti; Suelee Robbe-Austerman; Tod P. Stuber                                    |
| EPI_ISL_1497613<br>EPI_ISL_2928451                                                                                                                                                                     | State Veterinary Institute Prague<br>Texas Veterinary Medical Diagnostic Laboratory                                     | State Veterinary Institute Prague<br>Diagnostic Virology Laboratory, National Veterinary Services Laboratories, USDA1920 Dayton Avenue, Ames, IA 50010, USA                                                                                      | A; Cernikova; L; M; Nagy; Stara<br>Emily R. Love; Kerrie M. Franzen; Mary L. Killian; Mia Torchetti; Suelee Robbe-Austerman; Tod P. Stuber                                                                                                                                                                                                                                                                                                                                                                                                                   |
| EPI_ISL_5886784, EPI_ISL_5886785                                                                                                                                                                       | USDA APHIS VS                                                                                                           | Diagnostic Virology Laboratory, National Veterinary Services Laboratories, USDA1920 Dayton Avenue, Ames, IA 50010, USA                                                                                                                           | Emily R. Love; Kerrie M. Franzen; Mary L. Killian; Mia Torchetti; Suelee Robbe-Austerman; Tod P. Stuber                                                                                                                                                                                                                                                                                                                                                                                                                                                      |
| EPI_ISL_2928452, EPI_ISL_5899818, EPI_ISL_5937175, EPI_ISL_5937176, EPI_ISL_5937177<br>EPI_ISL_6639383                                                                                                 | Veterinary Diagnostic Laboratory University of Illinois at Urbana-Champaign<br>Veterinary Medical Diagnostic Laboratory | Diagnostic Virology Laboratory, National Veterinary Services Laboratories, USDA1920 Dayton Avenue, Ames, IA 50010, USA<br>Diagnostic Virology Laboratory, National Veterinary Services Laboratories, USDA1920 Dayton Avenue, Ames, IA 50010, USA | Emily R. Love; Kerrie M. Franzen; Mary L. Killian; Mia Torchetti; Suelee Robbe-Austerman; Tod P. Stuber<br>Emily R. Love; Kerrie M. Franzen; Mary L. Killian; Mia Torchetti; Suelee Robbe-Austerman; Tod P. Stuber                                                                                                                                                                                                                                                                                                                                           |
| EPI_ISL_566036, EPI_ISL_566037, EPI_ISL_566038, EPI_ISL_566044                                                                                                                                         | Wildlife Conservation Society, Bronx Zoo                                                                                | Diagnostic Virology Laboratory, United States Department of Agriculture, National Veterinary Services Laboratories, Population Medicine and Diagnostic Sciences, Cornell University                                                              | B.D.; Bartlett; Calle; Cardia Caserta, L.; Caserta; Cronk; D.C.; D.G.; Delaney; Diei; Elvinger; F.; Fang, Y.; Farnzen, K.; Frederikson, R.; Goodman, L.; Goodrich, E.; Hines Bergeson, N.; Ingerman, K.; Ivancic, M.; J.M.; Jenkin-Moore, M.; Killian; Kuzmin, I.; L.C.; Laverack, M.; M.A.; M.K.; M.L.; M.R.; Mauldin; Mauldin, M.; McAltoose, D.; McCann, C.; Mitchell; Mozingo, K.; Olmstead, C.; P.K.; P.P.; Queen, K.; S.L.; Slavinski, S.; Smith, Stokol, T.; Sykes, Terio, K.; Thomas, P.; Tong, S.; Torchetti; Wang, H.; Wang, L.; Yuan, F.; Zec, S. |
| EPI_ISL_6261983, EPI_ISL_6261987, EPI_ISL_6261989<br>see above                                                                                                                                         | ZARV, Department Medical Virology, University of Pretoria<br>Zoo Barcelona   IRTA-CReSA                                 | ZARV, Department Medical Virology, University of Pretoria<br>IrsiCaixa                                                                                                                                                                           | Adriano Mendes; Amy Strydom; Katja Koepfel; Lia Rotherham and Marietjie Venter<br>B. Clotet; F. Català-Moll; H. Fernández-Bellón; J. Vergara-Alert; J.Rodon; L. Fernández-Bastit; M. Casadellà; M. Noguera-Julian; M. Parera; R. Paredes                                                                                                                                                                                                                                                                                                                     |

We gratefully acknowledge the following Authors from the Originating laboratories responsible for obtaining the specimens, as well as the Submitting laboratories where the genome data were generated and shared via GISAID, on which this research is based.

All Submitters of data may be contacted directly via [www.gisaid.org](http://www.gisaid.org)

Authors are sorted alphabetically.

| Accession ID    | Originating Laboratory                                                                      | Submitting Laboratory                                                                                                          | Authors                                                                                                                                                                                                                                                                                     |
|-----------------|---------------------------------------------------------------------------------------------|--------------------------------------------------------------------------------------------------------------------------------|---------------------------------------------------------------------------------------------------------------------------------------------------------------------------------------------------------------------------------------------------------------------------------------------|
| EPI_ISL_1039212 | Biosafety Level 3 (BSL-3) core facility at Huazhong Agricultural University                 | State Key Laboratory of Agriculture Microbiology, Huazhong Agric Laboratory of Animal Virology, College of Veterinary Medicine | Yufei Zhang ; Kun Huang ; Zhong Zou ; Meilin Jin                                                                                                                                                                                                                                            |
| EPI_ISL_1615558 | State Key Laboratory of Agriculture Microbiology                                            | State Key Laboratory of Agriculture Microbiology, Huazhong Agric Laboratory of Animal Virology, College of Veterinary Medicine | Kun Huang and Meilin Jin                                                                                                                                                                                                                                                                    |
| EPI_ISL_1666328 | University of Iowa, Perlman Lab                                                             | University of Iowa, McCray Lab                                                                                                 | Alejandro A. Pezzulo; David K. Meyerholz; Fred Aswad; Jian Zheng; Justin Rebo; Kevin Wilhelmsen; Klaus Klumpp; Kristen Fortney; Kun Li; Lok-Yin Roy Wong; Makoto Murakami; Miguel E. Ortiz; Nicholas J. Schnicker; Paul B. McCray, Jr.; Peter J. Szachowicz; Shuh Narumiya; Stanley Perlman |
| EPI_ISL_459910  | Zoonotic and Exotic Infection Diseases Division, Harbin Veterinary Research Institute, CAAS | Zoonotic and Exotic Infection Diseases Division, Harbin Veterinary Research Institute, CAAS                                    | Chong Wang; Dan Shan; Gongxun Zhong; Jinliang Wang; Jinying Ge; Lei Shuai; Renqiang Liu; Xianfeng Zhang; Xijun He; Xijun Wang; Zhigao Bu; Zhiyuan Wen; Ziruo Sun                                                                                                                            |

We gratefully acknowledge the following Authors from the Originating laboratories responsible for obtaining the specimens, as well as the Submitting laboratories where the genome data were generated and shared via GISAID, on which this research is based.

All Submitters of data may be contacted directly via [www.gisaid.org](http://www.gisaid.org)

Authors are sorted alphabetically.

| <b>Accession ID</b> | <b>Originating Laboratory</b>                                                                                                                                                                                       | <b>Submitting Laboratory</b>             | <b>Authors</b>                                                                                                                                                                                                                                                                                                                                          |
|---------------------|---------------------------------------------------------------------------------------------------------------------------------------------------------------------------------------------------------------------|------------------------------------------|---------------------------------------------------------------------------------------------------------------------------------------------------------------------------------------------------------------------------------------------------------------------------------------------------------------------------------------------------------|
| EPI_ISL_493480      | Northumbria University / South Tees Hospitals NHS Foundation Trust / North Cumbria Integrated Care NHS Foundation Trust / North Tees and Hartlepool NHS Foundation Trust / Newcastle Hospitals NHS Foundation Trust | COVID-19 Genomics UK (COG-UK) Consortium | Andrew Nelson; Brendan Payne; Clive Graham; Darren L Smith; Debra Padgett; Edward Barton; Emma Swindells; Garren Scott; Gary Black; Gary Eltringham; Giles S Holt; Greg R Young; Jane Greenaway; Jennifer Collins; John Allan; Joshua Loh; Lynn Dover; Matthew Bashton; Mohammad A Tariq; Paul Baker; Sarah Essex; Steve Liggett; Wen C Yew; Yusri Taha |







|                                                                                                                                                                                                                                                                                                                                                                                                                                                                                                                                                                                                                                                                                                                                                                                                                                                                                                                                                                                                                                                                                                               |                                                                                       |                                                                                                                                              |                                                                                                                                                                                                                                                                                                                                                                                                                                                                                                    |  |
|---------------------------------------------------------------------------------------------------------------------------------------------------------------------------------------------------------------------------------------------------------------------------------------------------------------------------------------------------------------------------------------------------------------------------------------------------------------------------------------------------------------------------------------------------------------------------------------------------------------------------------------------------------------------------------------------------------------------------------------------------------------------------------------------------------------------------------------------------------------------------------------------------------------------------------------------------------------------------------------------------------------------------------------------------------------------------------------------------------------|---------------------------------------------------------------------------------------|----------------------------------------------------------------------------------------------------------------------------------------------|----------------------------------------------------------------------------------------------------------------------------------------------------------------------------------------------------------------------------------------------------------------------------------------------------------------------------------------------------------------------------------------------------------------------------------------------------------------------------------------------------|--|
| EPI_ISL_7056045, EPI_ISL_7056614                                                                                                                                                                                                                                                                                                                                                                                                                                                                                                                                                                                                                                                                                                                                                                                                                                                                                                                                                                                                                                                                              |                                                                                       |                                                                                                                                              |                                                                                                                                                                                                                                                                                                                                                                                                                                                                                                    |  |
| EPI_ISL_7062525                                                                                                                                                                                                                                                                                                                                                                                                                                                                                                                                                                                                                                                                                                                                                                                                                                                                                                                                                                                                                                                                                               | Spital Riggisberg                                                                     | Institute for Infectious Diseases, University of Bern                                                                                        | Alban Ramette; Christian Baumann; Cora Sägesser; Franziska Suter-Riniker; Loïc Borcard; Miguel A Terrazos Miani; Nicole Liechti; Pascal Bittel; Peter Keller; Sonja Gempeler; Stefan Neuenschwander; Stephen L Leib                                                                                                                                                                                                                                                                                |  |
| EPI_ISL_6963509                                                                                                                                                                                                                                                                                                                                                                                                                                                                                                                                                                                                                                                                                                                                                                                                                                                                                                                                                                                                                                                                                               | Sri Jayadeva Institute of Cardiovascular Sciences and Research / Strand Life Sciences | National Centre for Biological Sciences, TIFR - Rockefeller Foundation                                                                       | Aarati Karaba; Anson Kunjumon George; Aparnaa Ramanathan; Apurva Sarin; Chandrasekhar Vadlamudi; Chitra Pattabiraman; Darshan Sreenivas; Dasaradhi Palakodeti; Dimple Notani; Divya Priya A; Madhusudhan J; Manisha Bharadwaj; Manoj Kumar Jha; Mudasir Nazaar; Pradeep B P; Priyanka Ananta Mulay; Ramesh Hariharan; Rohan Pais; Satyajit Mayor; Saumitra Mardikar; Srivathsan Adimoolam; Uma Ramakrishnan; Vamsi Veeramachaneni; Vasanthapuram Ravi; Vijay Chandru; Vishal G Rao; Yasodha Kannan |  |
| EPI_ISL_7265233                                                                                                                                                                                                                                                                                                                                                                                                                                                                                                                                                                                                                                                                                                                                                                                                                                                                                                                                                                                                                                                                                               | St Vincent's Pathology (SydPath)                                                      | NSW Health Pathology - Institute of Clinical Pathology and Medical Research; Westmead Hospital; University of Sydney                         | Arnott A.; Draper J.; Gall M.; Martinez E.; Rockett R.; Sintchenko V.; on behalf of ICPMR                                                                                                                                                                                                                                                                                                                                                                                                          |  |
| EPI_ISL_7170972                                                                                                                                                                                                                                                                                                                                                                                                                                                                                                                                                                                                                                                                                                                                                                                                                                                                                                                                                                                                                                                                                               | Stadtspital Triemli                                                                   | Institute of Medical Virology                                                                                                                | Alexandra Trkola; Annette Audigé; Cyril Shah; Gabriela Ziltener; Guido Bloemberg; Jon Huder; Jürg Böni; Kevin Steiner; Maria Grünberg; Maryam Zaheer; Michael Huber; Riccarda Capaul; Stefan Schmutz; Verena Kufner                                                                                                                                                                                                                                                                                |  |
| EPI_ISL_6971472                                                                                                                                                                                                                                                                                                                                                                                                                                                                                                                                                                                                                                                                                                                                                                                                                                                                                                                                                                                                                                                                                               | Stadtspital Triemli                                                                   | Institute of Medical Virology, University of Zurich                                                                                          | Alexandra Trkola; Annette Audigé; Cyril Shah; Gabriela Ziltener; Guido Bloemberg; Jon Huder; Jürg Böni; Kevin Steiner; Maria Grünberg; Maryam Zaheer; Michael Huber; Riccarda Capaul; Stefan Schmutz; Verena Kufner                                                                                                                                                                                                                                                                                |  |
| EPI_ISL_7013425, EPI_ISL_7264087, EPI_ISL_7264088                                                                                                                                                                                                                                                                                                                                                                                                                                                                                                                                                                                                                                                                                                                                                                                                                                                                                                                                                                                                                                                             | State Laboratories Division, Hawaii State Department of Health                        | State Laboratories Division, Hawaii State Department of Health                                                                               | Ayana Garnet; Daniel Strange; Drew Kuwazaki; Edward Desmond; Pamela O'Brien; Razvan Sultana                                                                                                                                                                                                                                                                                                                                                                                                        |  |
| EPI_ISL_6883250                                                                                                                                                                                                                                                                                                                                                                                                                                                                                                                                                                                                                                                                                                                                                                                                                                                                                                                                                                                                                                                                                               | Swedish national genomic surveillance program of SARS-CoV-2                           | The Public Health Agency of Sweden                                                                                                           | Alma Brolund; Maria Lind Karlberg; Maximilian Riess; Swedish national genomic surveillance program of SARS-CoV-2                                                                                                                                                                                                                                                                                                                                                                                   |  |
| EPI_ISL_6825551                                                                                                                                                                                                                                                                                                                                                                                                                                                                                                                                                                                                                                                                                                                                                                                                                                                                                                                                                                                                                                                                                               | Territory Pathology                                                                   | Territory Pathology                                                                                                                          | Dimitrios Menouhos; Ella Meumann; Robert Baird                                                                                                                                                                                                                                                                                                                                                                                                                                                     |  |
| EPI_ISL_7171744                                                                                                                                                                                                                                                                                                                                                                                                                                                                                                                                                                                                                                                                                                                                                                                                                                                                                                                                                                                                                                                                                               | The Hope Clinic of Emory Vaccine Center, Emory University                             | Piantadosi Lab, Emory Department of Pathology                                                                                                | Anne Piantadosi; Azmain Taz; Dara Khosravi; Ethan Wang; Jesse Waggoner; Ludy Carmola; Marybeth Sexton; Nadine Rouphael                                                                                                                                                                                                                                                                                                                                                                             |  |
| EPI_ISL_7235629                                                                                                                                                                                                                                                                                                                                                                                                                                                                                                                                                                                                                                                                                                                                                                                                                                                                                                                                                                                                                                                                                               | Tulane University School of Medicine                                                  | Tulane University School of Medicine                                                                                                         | Di Tian                                                                                                                                                                                                                                                                                                                                                                                                                                                                                            |  |
| EPI_ISL_7160037, EPI_ISL_7160038, EPI_ISL_7160039                                                                                                                                                                                                                                                                                                                                                                                                                                                                                                                                                                                                                                                                                                                                                                                                                                                                                                                                                                                                                                                             | UW Virology Lab                                                                       | UW Virology Lab                                                                                                                              | Alexander Greninger; Hong Xie; Keith R Jerome; Meeli-Li Huang; Pavitra Roychoudhury; Pooneh Hajian; Ricardo Perez; Saraswathi Sathees; Sean Ellis; Shah Mohamed Bakhsh; Tien V. Nguyen                                                                                                                                                                                                                                                                                                             |  |
| EPI_ISL_7141056                                                                                                                                                                                                                                                                                                                                                                                                                                                                                                                                                                                                                                                                                                                                                                                                                                                                                                                                                                                                                                                                                               | Unipath Speciality Laboratory Limited, Ahmedabad                                      | Gujarat Biotechnology Research Centre                                                                                                        | Apurvashin Puvar; Bhadrashin Gohil; Chaitanya Joshi; Dinesh Kumar; Janvi Raval; Jwalant Shah; Madhvi Joshi; Nimesh Patel; Nitin Savaliya; Nitin Shukla; Priyank Chavda; Ramesh Pandit; Sonal Sharma; Zarna Patel                                                                                                                                                                                                                                                                                   |  |
| EPI_ISL_6929785, EPI_ISL_7195724, EPI_ISL_7195725, EPI_ISL_7195726                                                                                                                                                                                                                                                                                                                                                                                                                                                                                                                                                                                                                                                                                                                                                                                                                                                                                                                                                                                                                                            | University of Liège COVID-19 testing center                                           | GIGA Medical Genomics                                                                                                                        | Bouchra Boujemla; Claire Gourzonès; Cécile Meex; Keith Durkin; Laurent Gillet; Maria Artesi; Marie-Pierre Hayette; Nadine Cambisano; Nathalie Renotte; Olivier Ek; Sébastien Bontems; Vincent Bours                                                                                                                                                                                                                                                                                                |  |
| EPI_ISL_7136300, EPI_ISL_7136771                                                                                                                                                                                                                                                                                                                                                                                                                                                                                                                                                                                                                                                                                                                                                                                                                                                                                                                                                                                                                                                                              | Utah Public Health Laboratory                                                         | Utah Public Health Laboratory                                                                                                                | Erin L. Young; John Arn; Kelly F. Oakeson; Olinto Linares-Perdomo; Pooja Gupta; Tom Iverson                                                                                                                                                                                                                                                                                                                                                                                                        |  |
| EPI_ISL_7261603                                                                                                                                                                                                                                                                                                                                                                                                                                                                                                                                                                                                                                                                                                                                                                                                                                                                                                                                                                                                                                                                                               | VA Tampa Healthcare System                                                            | VHA Public Health Reference Laboratory                                                                                                       | Mark Holodniy on behalf of VA SEQFORCE; US Department of Veterans Affairs                                                                                                                                                                                                                                                                                                                                                                                                                          |  |
| EPI_ISL_6989662                                                                                                                                                                                                                                                                                                                                                                                                                                                                                                                                                                                                                                                                                                                                                                                                                                                                                                                                                                                                                                                                                               | Vault Health                                                                          | Minnesota Department of Health, Public Health Laboratory                                                                                     | Alyssa Mondelli; Elizabeth Horn; Jacob Garfin; Kelly Pung; Matt Plumb; Sarah Namugenyi; and Xiong Wang                                                                                                                                                                                                                                                                                                                                                                                             |  |
| EPI_ISL_7224567, EPI_ISL_7224577                                                                                                                                                                                                                                                                                                                                                                                                                                                                                                                                                                                                                                                                                                                                                                                                                                                                                                                                                                                                                                                                              | Viollier AG                                                                           | Clinical Bacteriology, University Hospital Basel                                                                                             | Adrian Egli; Alfredo Mari; Christiane Beckmann; Fanny Wegner; Hans Hirsch; Helena MB Seth-Smith; Julia Bielikki; Karoline Leuzinger; Manuel Battegay; Tim Roloff                                                                                                                                                                                                                                                                                                                                   |  |
| EPI_ISL_7285844, EPI_ISL_7285845, EPI_ISL_7285846, EPI_ISL_7285847, EPI_ISL_7285848                                                                                                                                                                                                                                                                                                                                                                                                                                                                                                                                                                                                                                                                                                                                                                                                                                                                                                                                                                                                                           | Virology Laboratory, Scientific Department, Army Medical Center                       | Virology Laboratory, Scientific Department, Army Medical Center                                                                              | Anella Monte; Anna Anselmo; Antonella Fortunato; Filippo Molinari; Florigio Lista; Francesco Giordani; Giancarlo Petralito; Giandomenico Cerreto; Giulia Campoli; Lucia Nicosia; Marzia Cavalli; Pietro Marco D'Angelo; Riccardo De Sanctis; Rossella Brandi; Silvia Fillo; Vanessa Vera Fain                                                                                                                                                                                                      |  |
| EPI_ISL_7263803                                                                                                                                                                                                                                                                                                                                                                                                                                                                                                                                                                                                                                                                                                                                                                                                                                                                                                                                                                                                                                                                                               | Wisconsin State Laboratory of Hygiene Communicable Disease Division                   | Wisconsin State Laboratory of Hygiene Communicable Disease Division                                                                          | Abigail C. Shockey; Alicia J. Mooney; Erika M. Hanson; Kelsey R. Florek; Richard Griesser; Sara Wagner; Tonya Danz                                                                                                                                                                                                                                                                                                                                                                                 |  |
| EPI_ISL_6795833, EPI_ISL_6795835, EPI_ISL_6795836, EPI_ISL_6795837, EPI_ISL_6795838, EPI_ISL_6795839, EPI_ISL_6795840, EPI_ISL_6795841, EPI_ISL_6795842, EPI_ISL_6795844, EPI_ISL_6795845, EPI_ISL_6795846, EPI_ISL_6795847, EPI_ISL_6795848, EPI_ISL_6795849, EPI_ISL_6795850, EPI_ISL_6825389, EPI_ISL_6825390, EPI_ISL_6825391, EPI_ISL_6825392, EPI_ISL_6825393, EPI_ISL_6825394, EPI_ISL_6825395, EPI_ISL_6825396, EPI_ISL_6825397, EPI_ISL_6825398, EPI_ISL_7015172, EPI_ISL_7015173, EPI_ISL_7015174, EPI_ISL_7015175, EPI_ISL_7015176, EPI_ISL_7015177, EPI_ISL_7015178, EPI_ISL_7015179, EPI_ISL_7015180, EPI_ISL_7015181, EPI_ISL_7015182, EPI_ISL_7015183, EPI_ISL_7015184, EPI_ISL_7015185, EPI_ISL_7015186, EPI_ISL_7015187, EPI_ISL_7015188, EPI_ISL_7015189, EPI_ISL_7015190, EPI_ISL_7015191, EPI_ISL_7015192, EPI_ISL_7015193, EPI_ISL_7015194, EPI_ISL_7015195, EPI_ISL_7015196, EPI_ISL_7015197, EPI_ISL_7015198, EPI_ISL_7015199, EPI_ISL_7015200, EPI_ISL_7015201, EPI_ISL_7015202, EPI_ISL_7015203, EPI_ISL_7015204, EPI_ISL_7015205, EPI_ISL_7015206, EPI_ISL_7015207, EPI_ISL_7015208 |                                                                                       |                                                                                                                                              |                                                                                                                                                                                                                                                                                                                                                                                                                                                                                                    |  |
| see above                                                                                                                                                                                                                                                                                                                                                                                                                                                                                                                                                                                                                                                                                                                                                                                                                                                                                                                                                                                                                                                                                                     | ZARV/NHLS, Department Medical Virology, University of Pretoria                        | CERI, Centre for Epidemic Response and Innovation, Stellenbosch University and KRISP, KZN Research Innovation and Sequencing Platform, UKZN. | Adriano Mendes; Amoaka D. Amy Strydom; Arisha Maharaj; Bestor P; Bhiman J; Engelbrecht S; Everatt J; Giandhari J; Goedhals D; Hardie D; Hsiao M; Iranzadeh A; Lessells R; Makatini Z; Maponga T; Mdlalose N; Micheala Davids; Miisana K; Moir M; NGS-SA (Scheepers C, Naidoo Y, Nyaga M) Giandhari J; Oluwakemi M; Pillay S; Preiser W; Ramphal U; Ramphal Y; San JE; Sim Mayaphi and Marietjie Venter; Tegally H; Tshiabula D; Venter M; Wilkinson E; Williamson C; de Oliveira T; von Gottberg A |  |



We gratefully acknowledge the following Authors from the Originating laboratories responsible for obtaining the specimens, as well as the Submitting laboratories where the genome data were generated and shared via GISAID, on which this research is based.

All Submitters of data may be contacted directly via [www.gisaid.org](http://www.gisaid.org)

Authors are sorted alphabetically.

| Accession ID    | Originating Laboratory                                                                      | Submitting Laboratory                                                                                                          | Authors                                                                                                                                                                                                                                                                                     |
|-----------------|---------------------------------------------------------------------------------------------|--------------------------------------------------------------------------------------------------------------------------------|---------------------------------------------------------------------------------------------------------------------------------------------------------------------------------------------------------------------------------------------------------------------------------------------|
| EPI_ISL_1039212 | Biosafety Level 3 (BSL-3) core facility at Huazhong Agricultural University                 | State Key Laboratory of Agriculture Microbiology, Huazhong Agric Laboratory of Animal Virology, College of Veterinary Medicine | Yufei Zhang ; Kun Huang ; Zhong Zou ; Meilin Jin                                                                                                                                                                                                                                            |
| EPI_ISL_1615558 | State Key Laboratory of Agriculture Microbiology                                            | State Key Laboratory of Agriculture Microbiology, Huazhong Agric Laboratory of Animal Virology, College of Veterinary Medicine | Kun Huang and Meilin Jin                                                                                                                                                                                                                                                                    |
| EPI_ISL_1666328 | University of Iowa, Perlman Lab                                                             | University of Iowa, McCray Lab                                                                                                 | Alejandro A. Pezzulo; David K. Meyerholz; Fred Aswad; Jian Zheng; Justin Rebo; Kevin Wilhelmsen; Klaus Klumpp; Kristen Fortney; Kun Li; Lok-Yin Roy Wong; Makoto Murakami; Miguel E. Ortiz; Nicholas J. Schnicker; Paul B. McCray, Jr.; Peter J. Szachowicz; Shuh Narumiya; Stanley Perlman |
| EPI_ISL_459910  | Zoonotic and Exotic Infection Diseases Division, Harbin Veterinary Research Institute, CAAS | Zoonotic and Exotic Infection Diseases Division, Harbin Veterinary Research Institute, CAAS                                    | Chong Wang; Dan Shan; Gongxun Zhong; Jinliang Wang; Jinying Ge; Lei Shuai; Renqiang Liu; Xianfeng Zhang; Xijun He; Xijun Wang; Zhigao Bu; Zhiyuan Wen; Ziruo Sun                                                                                                                            |

We gratefully acknowledge the following Authors from the Originating laboratories responsible for obtaining the specimens, as well as the Submitting laboratories where the genome data were generated and shared via GISAID, on which this research is based.

All Submitters of data may be contacted directly via [www.gisaid.org](http://www.gisaid.org)

Authors are sorted alphabetically.

| Accession ID                                                                                                                                                                                           | Originating Laboratory                                                                                                  | Submitting Laboratory                                                                                                                                                                                                                            | Authors                                                                                                                                                                                                                                                                                                                                                                                                                                                                                                                                                      |
|--------------------------------------------------------------------------------------------------------------------------------------------------------------------------------------------------------|-------------------------------------------------------------------------------------------------------------------------|--------------------------------------------------------------------------------------------------------------------------------------------------------------------------------------------------------------------------------------------------|--------------------------------------------------------------------------------------------------------------------------------------------------------------------------------------------------------------------------------------------------------------------------------------------------------------------------------------------------------------------------------------------------------------------------------------------------------------------------------------------------------------------------------------------------------------|
| EPI_ISL_3376985, EPI_ISL_3376991<br>EPI_ISL_2803214                                                                                                                                                    | Borås Djurpark AB<br>Centre for Dengue Research and AICBU, Department of Immunology and Molecular Medicine              | National Veterinary Institute<br>Centre for Dengue Research and AICBU, Department of Immunology and Molecular Medicine                                                                                                                           | Erika Karlstam; Hanne Friis; Helen T. Michael; Karl Ståhl; Katarina Näslund; Leif Dotevall; Linda Forslund; Siamak Zohari and Aleksija Neimanis; Therese Hård; Ulrika Larsson Pettersson<br>Aresha Mananper; Chandima Jeewandara; Deshan Madhusanka; Deshni Jayathilaka; Diyanath Ranasinghe; Gathsaurie Neelika Malavige; N P Sunil Chandra                                                                                                                                                                                                                 |
| EPI_ISL_6088015, EPI_ISL_6088016, EPI_ISL_6088018, EPI_ISL_6088025, EPI_ISL_6088026, EPI_ISL_6088034, EPI_ISL_6088040, EPI_ISL_6088041, EPI_ISL_6088044, EPI_ISL_6088046, EPI_ISL_6088051<br>see above | Colorado State University Veterinary Diagnostic Laboratory<br>Cornell Diagnostic Laboratory                             | Diagnostic Virology Laboratory, National Veterinary Services Laboratories, USDA1920 Dayton Avenue, Ames, IA 50010, USA<br>Diagnostic Virology Laboratory, National Veterinary Services Laboratories, USDA1920 Dayton Avenue, Ames, IA 50010, USA | Emily R. Love; Kerrie M. Franzen; Mary L. Killian; Mia Torchetti; Suelee Robbe-Austerman; Tod P. Stuber<br>Emily R. Love; Kerrie M. Franzen; Mary L. Killian; Mia Torchetti; Suelee Robbe-Austerman; Tod P. Stuber                                                                                                                                                                                                                                                                                                                                           |
| EPI_ISL_5867584, EPI_ISL_5867585                                                                                                                                                                       | Cornell Diagnostic Laboratory                                                                                           | Diagnostic Virology Laboratory, National Veterinary Services Laboratories, USDA1920 Dayton Avenue, Ames, IA 50010, USA                                                                                                                           | Emily R. Love; Kerrie M. Franzen; Mary L. Killian; Mia Torchetti; Suelee Robbe-Austerman; Tod P. Stuber                                                                                                                                                                                                                                                                                                                                                                                                                                                      |
| EPI_ISL_6088056, EPI_ISL_6088063, EPI_ISL_6088070, EPI_ISL_6088078                                                                                                                                     | Diagnostic Virology Laboratory, National Veterinary Services Laboratories, USDA1920 Dayton Avenue, Ames, IA 50010, USA  | Diagnostic Virology Laboratory, National Veterinary Services Laboratories, USDA1920 Dayton Avenue, Ames, IA 50010, USA                                                                                                                           | Emily R. Love; Kerrie M. Franzen; Mary L. Killian; Mia Torchetti; Suelee Robbe-Austerman; Tod P. Stuber                                                                                                                                                                                                                                                                                                                                                                                                                                                      |
| EPI_ISL_2821077, EPI_ISL_2821078, EPI_ISL_2821079, EPI_ISL_2821080<br>EPI_ISL_7016463                                                                                                                  | National Institute of High Security Animal Diseases<br>National Parks Board, Centre for Animal & Veterinary Sciences    | National Institute of High Security Animal Diseases<br>National Parks Board, Centre for Animal & Veterinary Sciences                                                                                                                             | Anamika Mishra; Ashutosh Aasdev; Ashwin A Raut; Chandan K Dubey; Dipesh K Nayak; Meghna Tripathi; Naveen Kumar; Pradeep N Gandhale; Sandeep Bhatia; Sushil Tripathi; Vijendra P Singh<br>Adrian; Charlene; Fernandez; Huangfu; Jasmine; Ong; Tan; Taoqi; Wang; Yifan                                                                                                                                                                                                                                                                                         |
| EPI_ISL_3098882, EPI_ISL_3098883, EPI_ISL_3098884, EPI_ISL_3098885<br>EPI_ISL_5899817                                                                                                                  | Nehru Zoological Park<br>Ohio Animal Disease Diagnostic Laboratory                                                      | CSIR-Centre for Cellular and Molecular Biology<br>Diagnostic Virology Laboratory, National Veterinary Services Laboratories, USDA1920 Dayton Avenue, Ames, IA 50010, USA                                                                         | Amareshwar Vodapalli; Ara Sreenivas; Archana Bharadwaj Siva; B Himarsi; B. Sambasiva Rao; Divya Tej Sowpati; Jandhyala Sai Krishna; Karthik Bharadwaj Tallapaka; Karthikeyan Vasudevan; Lamuk Zaveri; Md Abdul Hakeem; Onkar Kulkarni; Payel Mukherjee; Priya Nurkurthy; Rakesh K Mishra; Shreekanth Verma; Sofia Banu; Sumedha Avadhanula; Tulasi Nagabandi; Valli Nagalakshmi Undamatla; Vidhyadhari Methuku<br>Emily R. Love; Kerrie M. Franzen; Mary L. Killian; Mia Torchetti; Suelee Robbe-Austerman; Tod P. Stuber                                    |
| EPI_ISL_1497613<br>EPI_ISL_2928451                                                                                                                                                                     | State Veterinary Institute Prague<br>Texas Veterinary Medical Diagnostic Laboratory                                     | State Veterinary Institute Prague<br>Diagnostic Virology Laboratory, National Veterinary Services Laboratories, USDA1920 Dayton Avenue, Ames, IA 50010, USA                                                                                      | A; Cernikova; L; M; Nagy; Stara<br>Emily R. Love; Kerrie M. Franzen; Mary L. Killian; Mia Torchetti; Suelee Robbe-Austerman; Tod P. Stuber                                                                                                                                                                                                                                                                                                                                                                                                                   |
| EPI_ISL_5886784, EPI_ISL_5886785                                                                                                                                                                       | USDA APHIS VS                                                                                                           | Diagnostic Virology Laboratory, National Veterinary Services Laboratories, USDA1920 Dayton Avenue, Ames, IA 50010, USA                                                                                                                           | Emily R. Love; Kerrie M. Franzen; Mary L. Killian; Mia Torchetti; Suelee Robbe-Austerman; Tod P. Stuber                                                                                                                                                                                                                                                                                                                                                                                                                                                      |
| EPI_ISL_2928452, EPI_ISL_5899818, EPI_ISL_5937175, EPI_ISL_5937176, EPI_ISL_5937177<br>EPI_ISL_6639383                                                                                                 | Veterinary Diagnostic Laboratory University of Illinois at Urbana-Champaign<br>Veterinary Medical Diagnostic Laboratory | Diagnostic Virology Laboratory, National Veterinary Services Laboratories, USDA1920 Dayton Avenue, Ames, IA 50010, USA<br>Diagnostic Virology Laboratory, National Veterinary Services Laboratories, USDA1920 Dayton Avenue, Ames, IA 50010, USA | Emily R. Love; Kerrie M. Franzen; Mary L. Killian; Mia Torchetti; Suelee Robbe-Austerman; Tod P. Stuber<br>Emily R. Love; Kerrie M. Franzen; Mary L. Killian; Mia Torchetti; Suelee Robbe-Austerman; Tod P. Stuber                                                                                                                                                                                                                                                                                                                                           |
| EPI_ISL_566036, EPI_ISL_566037, EPI_ISL_566038, EPI_ISL_566044                                                                                                                                         | Wildlife Conservation Society, Bronx Zoo                                                                                | Diagnostic Virology Laboratory, United States Department of Agriculture, National Veterinary Services Laboratories, Population Medicine and Diagnostic Sciences, Cornell University                                                              | B.D.; Bartlett; Calle; Cardia Caserta, L.; Caserta; Cronk; D.C.; D.G.; Delaney; Diei; Elvinger; F.; Fang, Y.; Farnzen, K.; Frederikson, R.; Goodman, L.; Goodrich, E.; Hines Bergeson, N.; Ingerman, K.; Ivancic, M.; J.M.; Jenkin-Moore, M.; Killian; Kuzmin, I.; L.C.; Laverack, M.; M.A.; M.K.; M.L.; M.R.; Mauldin; Mauldin, M.; McAltoose, D.; McCann, C.; Mitchell; Mozingo, K.; Olmstead, C.; P.K.; P.P.; Queen, K.; S.L.; Slavinski, S.; Smith, Stokol, T.; Sykes, Terio, K.; Thomas, P.; Tong, S.; Torchetti; Wang, H.; Wang, L.; Yuan, F.; Zec, S. |
| EPI_ISL_6261983, EPI_ISL_6261987, EPI_ISL_6261989<br>see above                                                                                                                                         | ZARV, Department Medical Virology, University of Pretoria<br>Zoo Barcelona   IRTA-CReSA                                 | ZARV, Department Medical Virology, University of Pretoria<br>IrsiCaixa                                                                                                                                                                           | Adriano Mendes; Amy Strydom; Katja Koepfel; Lia Rotherham and Marietjie Venter<br>B. Clotet; F. Català-Moll; H. Fernández-Bellón; J. Vergara-Alert; J.Rodón; L. Fernández-Bastit; M. Casadellà; M. Noguera-Julian; M. Parera; R. Paredes                                                                                                                                                                                                                                                                                                                     |

We gratefully acknowledge the following Authors from the Originating laboratories responsible for obtaining the specimens, as well as the Submitting laboratories where the genome data were generated and shared via GISAID, on which this research is based.

All Submitters of data may be contacted directly via [www.gisaid.org](http://www.gisaid.org)

Authors are sorted alphabetically.

**Accession ID**

EPI\_ISL\_6260720

**Originating Laboratory**

Omega Diagnostics at Mounes

**Submitting Laboratory**

Omega Diagnostics at Mounes

**Authors**

Cherish Jackson; Cynthia Corley; Latira Haynes-Jacob; MD; Vivek Khare

We gratefully acknowledge the following Authors from the Originating laboratories responsible for obtaining the specimens, as well as the Submitting laboratories where the genome data were generated and shared via GISAID, on which this research is based.

All Submitters of data may be contacted directly via [www.gisaid.org](http://www.gisaid.org)

Authors are sorted alphabetically.

| <b>Accession ID</b>                                                                 | <b>Originating Laboratory</b>                        | <b>Submitting Laboratory</b>                                                                                           | <b>Authors</b>                                                                                          |
|-------------------------------------------------------------------------------------|------------------------------------------------------|------------------------------------------------------------------------------------------------------------------------|---------------------------------------------------------------------------------------------------------|
| EPI_ISL_5850338, EPI_ISL_5850339, EPI_ISL_5850340                                   | Bronson Animal Disease Diagnostic Laboratory         | Diagnostic Virology Laboratory, National Veterinary Services Laboratories, USDA1920 Dayton Avenue, Ames, IA 50010, USA | Emily R. Love; Kerrie M. Franzen; Mary L. Killian; Mia Torchetti; Suelee Robbe-Austerman; Tod P. Stuber |
| EPI_ISL_3152719, EPI_ISL_3152720, EPI_ISL_3152721, EPI_ISL_3152722, EPI_ISL_3152723 | University of Georgia College of Veterinary Medicine | Diagnostic Virology Laboratory, National Veterinary Services Laboratories, USDA1920 Dayton Avenue, Ames, IA 50010, USA | Emily R. Love; Kerrie M. Franzen; Mary L. Killian; Mia Torchetti; Suelee Robbe-Austerman; Tod P. Stuber |

We gratefully acknowledge the following Authors from the Originating laboratories responsible for obtaining the specimens, as well as the Submitting laboratories where the genome data were generated and shared via GISAID, on which this research is based.

All Submitters of data may be contacted directly via [www.gisaid.org](http://www.gisaid.org)

Authors are sorted alphabetically.

| Accession ID   | Originating Laboratory                                                                                                                  | Submitting Laboratory                                                                                                                   | Authors                                                                                                                                                                                                           |
|----------------|-----------------------------------------------------------------------------------------------------------------------------------------|-----------------------------------------------------------------------------------------------------------------------------------------|-------------------------------------------------------------------------------------------------------------------------------------------------------------------------------------------------------------------|
| EPI_ISL_402125 | National Institute for Communicable Disease Control and Prevention (ICDC) Chinese Center for Disease Control and Prevention (China CDC) | National Institute for Communicable Disease Control and Prevention (ICDC) Chinese Center for Disease Control and Prevention (China CDC) | Chen; Dai; F.-H.; Hu, Y.; J.-H.; J.-J.; J.-L. and Zhu; Liu, Y.; Pei; Q.-M.; She; Song; T.-Y.; Tao; Tian; Wang; Wang, W.; Wu, F.; Xu, L.; Y.-L.; Y.-M.; Y.-Y.; Y.-Z.; Yu, B.; Z.-G.; Z.-W.; Zhang; Zhao, S.; Zheng |

We gratefully acknowledge the following Authors from the Originating laboratories responsible for obtaining the specimens, as well as the Submitting laboratories where the genome data were generated and shared via GISAID, on which this research is based.

All Submitters of data may be contacted directly via [www.gisaid.org](http://www.gisaid.org)

Authors are sorted alphabetically.

| Accession ID                                                                         | Originating Laboratory                                                                                                       | Submitting Laboratory                                                                                                                                                                     | Authors                                                                                                                                                                                                                                                                                                                                                                                                                                                                                                                                        |
|--------------------------------------------------------------------------------------|------------------------------------------------------------------------------------------------------------------------------|-------------------------------------------------------------------------------------------------------------------------------------------------------------------------------------------|------------------------------------------------------------------------------------------------------------------------------------------------------------------------------------------------------------------------------------------------------------------------------------------------------------------------------------------------------------------------------------------------------------------------------------------------------------------------------------------------------------------------------------------------|
| EPI_ISL_3376849<br>EPI_ISL_5850335                                                   | Borås Djurpark AB<br>Bronson Animal Disease Diagnostic Laboratory                                                            | National Veterinary Institute, SVA<br>Diagnostic Virology Laboratory, National Veterinary Services Laboratories,<br>USDA1920 Dayton Avenue, Ames, IA 50010, USA                           | Aleksija Neimanis and Siamak Zohari; Erika Karlstam; Hanne Friis; Helen T. Michael; Karl Ståhl; Katarina Näslund; Leif Dotevall; Linda Forslund; Therese Hård; Ulrika Larsson Pettersson<br>Emily R. Love; Kerrie M. Franzen; Mary L. Killian; Mia Torchetti; Suelee Robbe-Austerman; Tod P. Stuber                                                                                                                                                                                                                                            |
| EPI_ISL_5850336, EPI_ISL_6261446,<br>EPI_ISL_6261447, EPI_ISL_6261448                | California Animal Health and Food Safety Laboratory -<br>University of California-Davis                                      | Diagnostic Virology Laboratory, National Veterinary Services Laboratories,<br>USDA1920 Dayton Avenue, Ames, IA 50010, USA                                                                 | Emily R. Love; Kerrie M. Franzen; Mary L. Killian; Mia Torchetti; Suelee Robbe-Austerman; Tod P. Stuber                                                                                                                                                                                                                                                                                                                                                                                                                                        |
| EPI_ISL_2928453, EPI_ISL_2928454                                                     | Cornell Diagnostic Laboratory                                                                                                | Diagnostic Virology Laboratory, National Veterinary Services Laboratories,<br>USDA1920 Dayton Avenue, Ames, IA 50010, USA                                                                 | Emily R. Love; Kerrie M. Franzen; Mary L. Killian; Mia Torchetti; Suelee Robbe-Austerman; Tod P. Stuber                                                                                                                                                                                                                                                                                                                                                                                                                                        |
| EPI_ISL_2928444, EPI_ISL_2928445                                                     | Cummings School of Veterinary Medicine at Tufts<br>University                                                                | Diagnostic Virology Laboratory, National Veterinary Services Laboratories,<br>USDA1920 Dayton Avenue, Ames, IA 50010, USA                                                                 | Emily R. Love; Kerrie M. Franzen; Mary L. Killian; Mia Torchetti; Suelee Robbe-Austerman; Tod P. Stuber                                                                                                                                                                                                                                                                                                                                                                                                                                        |
| EPI_ISL_5899822, EPI_ISL_6810903,<br>EPI_ISL_6810904                                 | Diagnostic Virology Laboratory, National Veterinary<br>Services Laboratories, USDA1920 Dayton Avenue,<br>Ames, IA 50010, USA | Diagnostic Virology Laboratory, National Veterinary Services Laboratories,<br>USDA1920 Dayton Avenue, Ames, IA 50010, USA                                                                 | Emily R. Love; Kerrie M. Franzen; Mary L. Killian; Mia Torchetti; Suelee Robbe-Austerman; Tod P. Stuber                                                                                                                                                                                                                                                                                                                                                                                                                                        |
| EPI_ISL_2928448, EPI_ISL_5867588,<br>EPI_ISL_5867592                                 | IDEXX Reference Laboratories                                                                                                 | Diagnostic Virology Laboratory, National Veterinary Services Laboratories,<br>USDA1920 Dayton Avenue, Ames, IA 50010, USA                                                                 | Emily R. Love; Kerrie M. Franzen; Mary L. Killian; Mia Torchetti; Suelee Robbe-Austerman; Tod P. Stuber                                                                                                                                                                                                                                                                                                                                                                                                                                        |
| EPI_ISL_2928446                                                                      | Kord Animal Health Diagnostic Laboratory                                                                                     | Diagnostic Virology Laboratory, National Veterinary Services Laboratories,<br>USDA1920 Dayton Avenue, Ames, IA 50010, USA                                                                 | Emily R. Love; Kerrie M. Franzen; Mary L. Killian; Mia Torchetti; Suelee Robbe-Austerman; Tod P. Stuber                                                                                                                                                                                                                                                                                                                                                                                                                                        |
| EPI_ISL_5320770, EPI_ISL_5320786,<br>EPI_ISL_6123998, EPI_ISL_6123999                | Nebraska Public Health Laboratory                                                                                            | NPHL COVID-19 Response Team                                                                                                                                                               | NPHL COVID-19 Response Team                                                                                                                                                                                                                                                                                                                                                                                                                                                                                                                    |
| EPI_ISL_5867587                                                                      | Ohio Department of Agriculture                                                                                               | Diagnostic Virology Laboratory, National Veterinary Services Laboratories,<br>USDA1920 Dayton Avenue, Ames, IA 50010, USA                                                                 | Emily R. Love; Kerrie M. Franzen; Mary L. Killian; Mia Torchetti; Suelee Robbe-Austerman; Tod P. Stuber                                                                                                                                                                                                                                                                                                                                                                                                                                        |
| EPI_ISL_3374076, EPI_ISL_6257965,<br>EPI_ISL_6257966, EPI_ISL_6257968                | San Diego County Public Health Laboratory                                                                                    | Andersen lab at Scripps Research                                                                                                                                                          | Brett Austin; Jovan Shephard; SEARCH Alliance San Diego with Ashleigh Murphy; SEARCH Alliance San Diego with Ashleigh Murphy and Brett Austin                                                                                                                                                                                                                                                                                                                                                                                                  |
| EPI_ISL_1497616                                                                      | State Veterinary Institute Prague                                                                                            | State Veterinary Institute Prague                                                                                                                                                         | A; Cernikova; L; M; Nagy; Stara                                                                                                                                                                                                                                                                                                                                                                                                                                                                                                                |
| EPI_ISL_2928449                                                                      | Texas Veterinary Medical Diagnostic Laboratory                                                                               | Diagnostic Virology Laboratory, National Veterinary Services Laboratories,<br>USDA1920 Dayton Avenue, Ames, IA 50010, USA                                                                 | Emily R. Love; Kerrie M. Franzen; Mary L. Killian; Mia Torchetti; Suelee Robbe-Austerman; Tod P. Stuber                                                                                                                                                                                                                                                                                                                                                                                                                                        |
| EPI_ISL_2928450, EPI_ISL_5867590                                                     | Veterinary Diagnostic Laboratory University of Illinois<br>at Urbana-Champaign                                               | Diagnostic Virology Laboratory, National Veterinary Services Laboratories,<br>USDA1920 Dayton Avenue, Ames, IA 50010, USA                                                                 | Emily R. Love; Kerrie M. Franzen; Mary L. Killian; Mia Torchetti; Suelee Robbe-Austerman; Tod P. Stuber                                                                                                                                                                                                                                                                                                                                                                                                                                        |
| EPI_ISL_6639379                                                                      | Veterinary Medical Diagnostic Laboratory                                                                                     | Diagnostic Virology Laboratory, National Veterinary Services Laboratories,<br>USDA1920 Dayton Avenue, Ames, IA 50010, USA                                                                 | Emily R. Love; Kerrie M. Franzen; Mary L. Killian; Mia Torchetti; Suelee Robbe-Austerman; Tod P. Stuber                                                                                                                                                                                                                                                                                                                                                                                                                                        |
| EPI_ISL_420293                                                                       | Wildlife Conservation Society, Bronx Zoo                                                                                     | Diagnostic Virology Laboratory, United States Department of Agriculture,<br>National Veterinary Services Laboratories                                                                     | Brittany Chilson; D. G. Diel; F. Yuan; Ivan Kuzmin; Kerrie Franzen; L. Wang; Laura B. Goodman; Mary Lea Killian; Melinda Jenkins-Moore; Nichole Hines Bergeson; Patrick K. Mitchell; Renee R. Anderson; Roopa Venugopalan; Tod P. Stuber; Y. Fang                                                                                                                                                                                                                                                                                              |
| EPI_ISL_566039, EPI_ISL_566040,<br>EPI_ISL_566041, EPI_ISL_566042,<br>EPI_ISL_566043 | Wildlife Conservation Society, Bronx Zoo                                                                                     | Diagnostic Virology Laboratory, United States Department of Agriculture,<br>National Veterinary Services Laboratories, Population Medicine and Diagnostic<br>Sciences, Cornell University | B.D.; Bartlett; Calle; Cardia Caserta, L.; Caserta; Cronk; D.C.; D.G.; Delaney; Diel; Elvinger, F.; Fang, Y.; Farznen, K.; Frederikson, R.; Goodman, L.; Goodrich, E.; Hines Bergeson, N.; Ingeman, K.; Ivancic, M.; J.M.; Jenkins-Moore, M.; Killian; Kuzmin, I.; L.C.; Laverack, M.; M.A.; M.K.; M.L.; M.R.; Mauldin; McAloose, D.; McCann, C.; Mitchell; Mazingo, K.; Olmstead, C.; P.K.; P.P.; Queen, K.; S.L.; Slavinski, S.; Smith; Stokol, T.; Sykes; Terio, K.; Thomas, P.; Tong, S.; Torchetti; Wang, H.; Wang, L.; Yuan, F.; Zec, S. |

We gratefully acknowledge the following Authors from the Originating laboratories responsible for obtaining the specimens, as well as the Submitting laboratories where the genome data were generated and shared via GISAID, on which this research is based.

All Submitters of data may be contacted directly via [www.gisaid.org](http://www.gisaid.org)

Authors are sorted alphabetically.

| <b>Accession ID</b> | <b>Originating Laboratory</b>                                                                | <b>Submitting Laboratory</b>                                                       | <b>Authors</b>                   |
|---------------------|----------------------------------------------------------------------------------------------|------------------------------------------------------------------------------------|----------------------------------|
| EPI_ISL_614478      | Department of Virus and Microbiological Special Diagnostics, Statens Serum Institut, Denmark | Albertsen lab, Department of Chemistry and Bioscience, Aalborg University, Denmark | Danish Covid-19 Genome Consortia |

We gratefully acknowledge the following Authors from the Originating laboratories responsible for obtaining the specimens, as well as the Submitting laboratories where the genome data were generated and shared via GISAID, on which this research is based.

All Submitters of data may be contacted directly via [www.gisaid.org](http://www.gisaid.org)

Authors are sorted alphabetically.

| <b>Accession ID</b> | <b>Originating Laboratory</b>               | <b>Submitting Laboratory</b>                | <b>Authors</b>                                                                                                                                                         |
|---------------------|---------------------------------------------|---------------------------------------------|------------------------------------------------------------------------------------------------------------------------------------------------------------------------|
| EPI_ISL_5803018     | Virology Unit, Institut Pasteur du Cambodge | Virology Unit, Institut Pasteur du Cambodge | Cecile Troupin; Chau Darapheak; Chin Savuth; Erik A Karlsson; Jurre Y Siegers; Kraing Sidonn; Leakhena Pum; Ly Sovann; Sophoannadeth Rath; Veasna Duong; Yi Sengdoeurn |



We gratefully acknowledge the following Authors from the Originating laboratories responsible for obtaining the specimens, as well as the Submitting laboratories where the genome data were generated and shared via GISAID, on which this research is based.

All Submitters of data may be contacted directly via [www.gisaid.org](http://www.gisaid.org)

Authors are sorted alphabetically.

| <b>Accession ID</b> | <b>Originating Laboratory</b>                                               | <b>Submitting Laboratory</b>                                                                                           | <b>Authors</b>                                                                                          |
|---------------------|-----------------------------------------------------------------------------|------------------------------------------------------------------------------------------------------------------------|---------------------------------------------------------------------------------------------------------|
| EPI_ISL_5899809     | Veterinary Diagnostic Laboratory University of Illinois at Urbana-Champaign | Diagnostic Virology Laboratory, National Veterinary Services Laboratories, USDA1920 Dayton Avenue, Ames, IA 50010, USA | Emily R. Love; Kerrie M. Franzen; Mary L. Killian; Mia Torchetti; Suelee Robbe-Austerman; Tod P. Stuber |

We gratefully acknowledge the following Authors from the Originating laboratories responsible for obtaining the specimens, as well as the Submitting laboratories where the genome data were generated and shared via GISAID, on which this research is based.

All Submitters of data may be contacted directly via [www.gisaid.org](http://www.gisaid.org)

Authors are sorted alphabetically.

| <b>Accession ID</b> | <b>Originating Laboratory</b>                                                                | <b>Submitting Laboratory</b>                                                       | <b>Authors</b>                   |
|---------------------|----------------------------------------------------------------------------------------------|------------------------------------------------------------------------------------|----------------------------------|
| EPI_ISL_614478      | Department of Virus and Microbiological Special Diagnostics, Statens Serum Institut, Denmark | Albertsen lab, Department of Chemistry and Bioscience, Aalborg University, Denmark | Danish Covid-19 Genome Consortia |

We gratefully acknowledge the following Authors from the Originating laboratories responsible for obtaining the specimens, as well as the Submitting laboratories where the genome data were generated and shared via GISAID, on which this research is based.

All Submitters of data may be contacted directly via [www.gisaid.org](http://www.gisaid.org)

Authors are sorted alphabetically.

| <b>Accession ID</b>                               | <b>Originating Laboratory</b>                                                        | <b>Submitting Laboratory</b>                                                                                           | <b>Authors</b>                                                                                          |
|---------------------------------------------------|--------------------------------------------------------------------------------------|------------------------------------------------------------------------------------------------------------------------|---------------------------------------------------------------------------------------------------------|
| EPI_ISL_5858432, EPI_ISL_5858433                  | California Animal Health and Food Safety Laboratory - University of California-Davis | Diagnostic Virology Laboratory, National Veterinary Services Laboratories, USDA1920 Dayton Avenue, Ames, IA 50010, USA | Emily R. Love; Kerrie M. Franzen; Mary L. Killian; Mia Torchetti; Suelee Robbe-Austerman; Tod P. Stuber |
| EPI_ISL_5320764, EPI_ISL_5320780                  | Nebraska Public Health Laboratory                                                    | NPHL COVID-19 Response Team                                                                                            | NPHL COVID-19 Response Team                                                                             |
| EPI_ISL_3261746, EPI_ISL_3261747                  | San Diego County Public Health Laboratory                                            | Andersen lab at Scripps Research                                                                                       | Brett Austin; Jovan Shephard; SEARCH Alliance San Diego with Ashleigh Murphy                            |
| EPI_ISL_2928447, EPI_ISL_5899827, EPI_ISL_5899828 | Veterinary Diagnostic Laboratory University of Illinois at Urbana-Champaign          | Diagnostic Virology Laboratory, National Veterinary Services Laboratories, USDA1920 Dayton Avenue, Ames, IA 50010, USA | Emily R. Love; Kerrie M. Franzen; Mary L. Killian; Mia Torchetti; Suelee Robbe-Austerman; Tod P. Stuber |

We gratefully acknowledge the following Authors from the Originating laboratories responsible for obtaining the specimens, as well as the Submitting laboratories where the genome data were generated and shared via GISAID, on which this research is based.

All Submitters of data may be contacted directly via [www.gisaid.org](http://www.gisaid.org)

Authors are sorted alphabetically.

| Accession ID                                                                                                                                                                                                                                                                                                                                                                                                                                                                                                                                                                                                                                                                                                                                                                                                                                                                                                                                                                                                                                                                                                                                                                                                                                                                                                                                                                                                                                                                                                                                                                                                                                                 | Originating Laboratory                                  | Submitting Laboratory                                              | Authors                                                                                                                                                                                                                                                                                                     |
|--------------------------------------------------------------------------------------------------------------------------------------------------------------------------------------------------------------------------------------------------------------------------------------------------------------------------------------------------------------------------------------------------------------------------------------------------------------------------------------------------------------------------------------------------------------------------------------------------------------------------------------------------------------------------------------------------------------------------------------------------------------------------------------------------------------------------------------------------------------------------------------------------------------------------------------------------------------------------------------------------------------------------------------------------------------------------------------------------------------------------------------------------------------------------------------------------------------------------------------------------------------------------------------------------------------------------------------------------------------------------------------------------------------------------------------------------------------------------------------------------------------------------------------------------------------------------------------------------------------------------------------------------------------|---------------------------------------------------------|--------------------------------------------------------------------|-------------------------------------------------------------------------------------------------------------------------------------------------------------------------------------------------------------------------------------------------------------------------------------------------------------|
| EPI_ISL_5804716, EPI_ISL_5804717, EPI_ISL_5804718, EPI_ISL_5804719, EPI_ISL_5804720, EPI_ISL_5804721, EPI_ISL_5804722, EPI_ISL_5804723, EPI_ISL_5804724, EPI_ISL_5804725, EPI_ISL_5804726, EPI_ISL_5804727, EPI_ISL_5804728, EPI_ISL_5804729, EPI_ISL_5804730, EPI_ISL_5804731, EPI_ISL_5804732, EPI_ISL_5804733, EPI_ISL_5804734, EPI_ISL_5804735, EPI_ISL_5804736, EPI_ISL_5804737, EPI_ISL_5804738, EPI_ISL_5804739, EPI_ISL_5804740, EPI_ISL_5804741, EPI_ISL_5804742, EPI_ISL_5804743, EPI_ISL_5804744, EPI_ISL_5804745, EPI_ISL_5804746, EPI_ISL_5804747, EPI_ISL_5804748, EPI_ISL_5804749, EPI_ISL_5804750, EPI_ISL_5804751, EPI_ISL_5804752, EPI_ISL_5804753, EPI_ISL_5804754, EPI_ISL_5804755, EPI_ISL_5804756, EPI_ISL_5804757, EPI_ISL_5804758, EPI_ISL_5804759, EPI_ISL_5804760, EPI_ISL_5804761, EPI_ISL_5804762, EPI_ISL_5804763, EPI_ISL_5804764, EPI_ISL_5804765, EPI_ISL_5804766, EPI_ISL_5804767, EPI_ISL_5804768, EPI_ISL_5804769, EPI_ISL_5804770, EPI_ISL_5804771, EPI_ISL_5804772, EPI_ISL_5804773, EPI_ISL_5804774, EPI_ISL_5804775, EPI_ISL_5804776, EPI_ISL_5804777, EPI_ISL_5804778, EPI_ISL_5804779, EPI_ISL_5804780, EPI_ISL_5804781, EPI_ISL_5804782, EPI_ISL_5804783, EPI_ISL_5804784, EPI_ISL_5804785, EPI_ISL_5804786, EPI_ISL_5804787, EPI_ISL_6425266, EPI_ISL_6425267, EPI_ISL_6425268, EPI_ISL_6425269, EPI_ISL_6425270, EPI_ISL_6425271, EPI_ISL_6425272, EPI_ISL_6425273, EPI_ISL_6425274, EPI_ISL_6425275, EPI_ISL_6425276, EPI_ISL_6425277, EPI_ISL_6425278, EPI_ISL_6425279, EPI_ISL_6425280, EPI_ISL_6425281, EPI_ISL_6425282, EPI_ISL_6425283, EPI_ISL_6425284, EPI_ISL_6425285, EPI_ISL_6425286, EPI_ISL_6425287 | Department of Natural Resources, IA                     | Pennsylvania State Laboratory                                      | Meera Surendran Nair; Suresh Kuchipudi; Vivek Kapur                                                                                                                                                                                                                                                         |
| EPI_ISL_4847031, EPI_ISL_4878314, EPI_ISL_4878315, EPI_ISL_4878322                                                                                                                                                                                                                                                                                                                                                                                                                                                                                                                                                                                                                                                                                                                                                                                                                                                                                                                                                                                                                                                                                                                                                                                                                                                                                                                                                                                                                                                                                                                                                                                           | The Ohio State University Infectious Diseases Institute | The Ohio State University Applied Microbiology Services Laboratory | Amanda M. Williams; Andrew S. Bowman; Christopher Madden; Dakota L. Sizemore; Devra Huey; Dillon S. McBride; Emily R. Love; Jacob W. Smith; Jaqueline M. Nolting; Kerrie M. Franzen; Mary L. Killian; Mia Torchetti; Patricia Dennis; Seth A. Faith; Suelee Robbe-Austerman; Tod P. Stuber; Vanessa L. Hale |
| EPI_ISL_4847029, EPI_ISL_4847030, EPI_ISL_4847032, EPI_ISL_4847033, EPI_ISL_4878316, EPI_ISL_4878317, EPI_ISL_4878318, EPI_ISL_4878319, EPI_ISL_4878320, EPI_ISL_4878321                                                                                                                                                                                                                                                                                                                                                                                                                                                                                                                                                                                                                                                                                                                                                                                                                                                                                                                                                                                                                                                                                                                                                                                                                                                                                                                                                                                                                                                                                     | The Ohio State University Infectious Diseases Institute | USDA National Veterinary Services Laboratory                       | Amanda M. Williams; Andrew S. Bowman; Christopher Madden; Dakota L. Sizemore; Devra Huey; Dillon S. McBride; Emily R. Love; Jacob W. Smith; Jaqueline M. Nolting; Kerrie M. Franzen; Mary L. Killian; Mia Torchetti; Patricia Dennis; Seth A. Faith; Suelee Robbe-Austerman; Tod P. Stuber; Vanessa L. Hale |
| see above                                                                                                                                                                                                                                                                                                                                                                                                                                                                                                                                                                                                                                                                                                                                                                                                                                                                                                                                                                                                                                                                                                                                                                                                                                                                                                                                                                                                                                                                                                                                                                                                                                                    |                                                         |                                                                    |                                                                                                                                                                                                                                                                                                             |

We gratefully acknowledge the following Authors from the Originating laboratories responsible for obtaining the specimens, as well as the Submitting laboratories where the genome data were generated and shared via GISAID, on which this research is based.

All Submitters of data may be contacted directly via [www.gisaid.org](http://www.gisaid.org)

Authors are sorted alphabetically.

| Accession ID   | Originating Laboratory                                                                                                                  | Submitting Laboratory                                                                                                                   | Authors                                                                                                                                                                                                           |
|----------------|-----------------------------------------------------------------------------------------------------------------------------------------|-----------------------------------------------------------------------------------------------------------------------------------------|-------------------------------------------------------------------------------------------------------------------------------------------------------------------------------------------------------------------|
| EPI_ISL_402125 | National Institute for Communicable Disease Control and Prevention (ICDC) Chinese Center for Disease Control and Prevention (China CDC) | National Institute for Communicable Disease Control and Prevention (ICDC) Chinese Center for Disease Control and Prevention (China CDC) | Chen; Dai; F.-H.; Hu, Y.; J.-H.; J.-J.; J.-L. and Zhu; Liu, Y.; Pei; Q.-M.; She; Song; T.-Y.; Tao; Tian; Wang; Wang, W.; Wu, F.; Xu, L.; Y.-L.; Y.-M.; Y.-Y.; Y.-Z.; Yu, B.; Z.-G.; Z.-W.; Zhang; Zhao, S.; Zheng |
